1 **Structural basis for the unique multifaceted interaction of DPPA3 with the UHRF1 PHD**

2 **finger**

3

4 Keiichi Hata<sup>1,#</sup>, Naohiro Kobayashi<sup>2,#</sup>, Keita Sugimura<sup>3</sup>, Weihua Qin<sup>4</sup>, Deis Haxholli<sup>4</sup>, Yoshie  
5 Chiba<sup>3</sup>, Gosuke Hayashi<sup>5</sup>, Hiroki Onoda<sup>1</sup>, Takahisa Ikegami<sup>6</sup>, Christopher B. Mulholland<sup>4</sup>,  
6 Atsuya Nishiyama<sup>3</sup>, Makoto Nakanishi<sup>3</sup>, Heinrich Leonhardt<sup>4</sup>, Tsuyoshi Konuma<sup>6,\*</sup>, Kyohei  
7 Arita<sup>1,\*</sup>

8

9 <sup>1</sup>Structure Biology Laboratory and <sup>6</sup>Structural Epigenetics Laboratory, Graduate School of  
10 Medical Life Science, Yokohama City University, 1-7-29, Suehiro-cho, Tsurumi-ku, Yokohama,  
11 Kanagawa 230-0045, Japan.

12 <sup>2</sup>RIKEN Center for Biosystems Dynamics Research, Suehiro-cho 1-7-22, Tsurumi, Yokohama,  
13 Kanagawa 230-0045, Japan.

14 <sup>3</sup>Division of Cancer Cell Biology, The Institute of Medical Science, The University of Tokyo,  
15 4-6-1 Shirokanedai, Minato-ku, Tokyo 108-8639, Japan.

16 <sup>4</sup>Faculty of Biology, Ludwig-Maximilians-Universität München, Munich, Germany.

17 <sup>5</sup>Department of Biomolecular Engineering, Nagoya University, Furo-cho, Chikusa-ku, Nagoya  
18 464-8603, Japan.

19

20 \* To whom correspondence should be addressed. Tel: (+81)45-508-7225; Fax: (+81)45-508-  
21 7365; Email: aritak@yokohama-cu.ac.jp

22 Correspondence may also be addressed to Tsuyoshi Konuma. Tel: (+81)45-508-7218; Fax:  
23 (+81)45-508-7362; Email: konumax@yokohama-cu.ac.jp

24

25 # The authors wish it to be known that, in their opinion, the first two authors should be regarded  
26 as Joint First Authors.

27

28 Present Address: Hiroki Onoda, Synchrotron Radiation Research Center, Nagoya University,  
29 Furo-cho, Chikusa-ku, Nagoya, 464-8603, JAPAN.

1 **ABSTRACT**

2 Ubiquitin-like with PHD and RING finger domain-containing protein 1 (UHRF1)-dependent  
3 DNA methylation is essential for maintaining cell fate during cell proliferation. Developmental  
4 pluripotency-associated 3 (DPPA3) is an intrinsically disordered protein that specifically  
5 interacts with UHRF1 and promotes DNA demethylation by inhibiting UHRF1 chromatin  
6 localization. However, the molecular basis of how DPPA3 interacts with and inhibits UHRF1  
7 remains unclear. We aimed to determine the solution nuclear magnetic resonance structure of  
8 the mouse UHRF1 plant homeodomain (PHD) complexed with DPPA3. Induced  $\alpha$ -helices in  
9 DPPA3 upon binding of UHRF1 PHD contribute to stable complex formation with multifaceted  
10 interactions, unlike canonical ligand proteins of the PHD domain. Mutations in the binding  
11 interface and unfolding of the DPPA3 helical structure inhibited binding to UHRF1 and its  
12 chromatin localization. Our results provide structural insights into the mechanism and  
13 specificity underlying the inhibition of UHRF1 by DPPA3.

14

## 1 INTRODUCTION

2 Cytosine DNA methylation of the CpG sequence in mammals plays a pivotal role in  
3 embryogenesis, retrotransposon silencing, X-chromosome inactivation, genome imprinting,  
4 and carcinogenesis(1). Mammalian cells undergo two waves of methylation changes: DNA  
5 methylation and demethylation(2). After fertilization, DNA methylation patterns derived from  
6 gametes are erased during early embryogenesis and are re-established during cellular  
7 development(3). DNA methylation patterns in primordial germ cells (PGCs) are erased globally,  
8 and sex-specific DNA methylation patterns are established during germ cell development(2, 4).  
9 After establishment, cell-type-specific DNA methylation patterns are faithfully propagated  
10 after each cycle of replication to maintain cellular identity. DNMT1, a maintenance DNA  
11 methyltransferase, the ubiquitin-like PHD and RING finger domain-containing protein 1  
12 (UHRF1), which is a ubiquitin E3-ligase and recruiter of DNMT1, are essential for DNA  
13 methylation maintenance(5–8). UHRF1 specifically binds to hemi-methylated DNA and  
14 ubiquitinates histone H3 and PCNA-associated factor 15 (PAF15) to recruit DNMT1 to  
15 chromatin and replication sites(9–13). The two distinct ubiquitin signals are involved in  
16 replication-coupled and uncoupled DNA methylation maintenance(9, 14, 15).

17 UHRF1 functions as a reader of epigenetic marks, hemi-methylated DNA, and the  
18 H3K9me2/3 modification(16–19) to regulate its ubiquitination activity(20). Further, it serves  
19 as a binding platform for DNA replication factors and epigenetic modifiers, which are involved  
20 in DNA methylation maintenance, gene expression, DNA damage repair, and tumorigenesis(9,  
21 21–28). Additionally, mouse DPPA3 (developmental pluripotency associated 3, also known as  
22 Stella/PGC7; hereafter mDPPA3) is a novel ligand that regulates the binding of UHRF1 to  
23 chromatin(29, 30). mDPPA3, an intrinsically disordered protein (IDP), is specifically expressed  
24 in PGCs, oocytes, and preimplantation embryos, and plays an important role in the formation  
25 of oocyte-specific DNA methylation patterns by preventing excessive *de novo* DNA  
26 methylation mediated by UHRF1(29, 31–33). Overexpression of mDPPA3 in somatic cells

1 such as NIH3T3, HEK293, and mouse embryonic stem cells, and in non-mammalian species,  
2 results in genome-wide DNA demethylation, indicating that mDPPA3 is a DNA demethylation  
3 factor that inhibits the cellular functions of UHRF1(29, 34, 35).

4 UHRF1 has five functional domains: a ubiquitin-like domain (UBL), tandem tudor  
5 domain (TTD), plant homeo finger domain (PHD), SET and RING associated domain (SRA),  
6 and really new interesting gene (RING) (Figure 1A). mDPPA3 interacts with the UHRF1 PHD  
7 finger, resulting in the inhibition of chromatin binding of UHRF1(35, 36). The UHRF1 PHD  
8 finger also interacts with the N-terminal <sup>1</sup>ARTK<sup>4</sup> in histone H3 (H3) and <sup>1</sup>VRTK<sup>4</sup> in PAF15, in  
9 which strict recognition of the main chain amino group at the first residue of H3 and PAF15 is  
10 critical for their ubiquitination(9, 19). The PHD finger is one of the largest families of  
11 chromatin-reader domains. They have been found in more than 100 human proteins, most of  
12 which recognize K4 methylation state in the H3 N-terminal tail(37). Notably, with a few  
13 exceptions, the recognition mode of the first amino acid residue amino group in ligands is  
14 conserved among almost all PHD fingers(38). Indeed, acetylation of the N-terminus of the H3  
15 tail abolished binding to the PHD finger of UHRF1(19). Given that the ARTK/VRTK-like  
16 sequence is not present at the N-terminus of mDPPA3, the molecular mechanisms by which  
17 the UHRF1 PHD finger recognizes DPPA3 is unknown.

18 Here, we aimed to determine the solution structure of mouse UHRF1 PHD (mPHD)  
19 in complex with the C-terminal fragment of mDPPA3 using nuclear magnetic resonance  
20 (NMR), and identified the unique multifaceted interaction of mDPPA3 with mPHD. Although  
21 the <sup>88</sup>VRT<sup>90</sup> cassette of mDPPA3 is not located at its N-terminus, unlike H3 or PAF15, we found  
22 that it was recognized by a shallow acidic groove on the mPHD in a manner similar to the N-  
23 terminus of H3 and PAF15. Structural induction of the two  $\alpha$ -helices of mDPPA3 provided  
24 several additional binding sites for mPHD, which plays an important role in stable complex  
25 formation. Structure-guided mutagenesis and functional assays using *Xenopus* egg extracts and  
26 mouse embryonic stem cells (mESCs) helped evaluate the key amino acid residues of mDPPA3

1 that negatively regulate the binding of mUHRF1 to chromatin, and shed light on the  
2 mechanisms underlying chromatin delocalization of mUHRF1 by mDPPA3. Our data provide  
3 insight into the diversity of recognition of ligand proteins by the PHD finger and contribute to  
4 the understanding of its key role in epigenetic maintenance.

5

## 6 **MATERIALS AND METHODS**

### 7 **Protein expression and purification**

8 For NMR and ITC experiments, cDNA of mouse UHRF1 PHD (residues 304-372)  
9 was sub-cloned into a pGEX6P-1 plasmid (Cytiva) at 5'-BamHI and 3'-XhoI sites for protein  
10 expression with N-terminal glutathione S-transferase (GST). The protein was expressed in  
11 *E.coli* BL21 (DE3) in Luria–Bertani medium (LB) containing 50 µg/mL ampicillin. When the  
12 optical density at 660 nm (O.D.<sub>660</sub>) of the cells reached 0.7, 0.2 mM isopropyl β-d-  
13 thiogalactoside (IPTG) was added to the medium and the cells were further harvested for 3  
14 hours at 37 °C. The cells were suspended with lysis buffer (40 mM Tris-HCl [pH 8.0], 300 mM  
15 NaCl, 10% Glycerol, 30 µM Zn-acetate, 0.5 mM TCEP) and disrupted by sonication. After the  
16 cell debris were removed by centrifugation, the supernatant was loaded to GST-affinity column,  
17 GS4B (Cytiva). After the protein was eluted from the column using reduced glutathione, GST-  
18 tag was cleaved by HRV-3C protease. The sample was further purified by HiTrap Q HP anion-  
19 exchange chromatography (Cytiva). Final purification was performed using HiLoad 26/600  
20 Superdex 75 size-exclusion chromatography (Cytiva) equilibrated with buffer 1×phosphate-  
21 buffered saline (adjusted to pH 7.0; PBS) containing 1 mM DTT.

22 mDPPA3 for NMR and ITC experiments was expressed as a six histidine-tagged  
23 ubiquitin fusion protein. The procedures for cell culture were same as mPHD. The cells were  
24 suspended by lysis buffer (30 mM HEPES [pH7.5], 400 mM NaCl, 0.1% Nonidet P-40, 40 mM  
25 Imidazole). After cell lysis by sonication and removal of cell debris by centrifugation, the  
26 supernatant was loaded to histidine-tag affinity column Ni Sepharose 6 Fast Flow (Cytiva), and

1 the sample was eluted from the column by an elution buffer containing 500 mM imidazole.  
2 After histidine-tag was removed by *Saccharomyces cerevisiae* ubiquitin carboxyl-terminal  
3 hydrolase YUH1. The sample was further purified by HiTrap SP HP cation-exchange  
4 chromatography (Cytiva) and finally purified by HiLoad 26/600 Superdex 75 size-exclusion  
5 chromatography (Cytiva) equilibrated with 1×PBS buffer containing 1 mM DTT.

6 For structure determination by NMR, cDNA of mDPPA3 (residues 76-127) was  
7 inserted into 3' end of the mPHD (residues 304-372) in pGEX6P-1 plasmid for expression as  
8 fusion protein. The procedures for cell culture of the mPHD-mDPPA3 were same as mPHD.  
9 The cells were suspended with lysis buffer (40 mM Tris-HCl [pH 8.0], 300 mM NaCl, 10%  
10 Glycerol, 30 μM Zn-acetate, 0.5 mM TCEP) and then disrupted by sonication. After the cell  
11 debris was removed by centrifugation, the supernatant was load to GS4B. The protein was  
12 eluted from the column by reduced glutathione, and then GST-tag was cleaved by HRV-3C  
13 protease. The sample was further purified by HiLoad 26/600 Superdex 75 size-exclusion  
14 chromatography equilibrated with 1×PBS buffer containing 1 mM DTT.

15 For preparation of <sup>15</sup>N-labeled or <sup>15</sup>N,<sup>13</sup>C-double labeled mPHD, mDPPA3 and  
16 mPHD-mDPPA3, M9 minimal media containing 0.5 g/L <sup>15</sup>NH<sub>4</sub>Cl or 0.5 g/L <sup>15</sup>NH<sub>4</sub>Cl and 1 g/L  
17 <sup>13</sup>C-glucose was used instead of LB media. Site-directed mutagenesis was performed by  
18 designing two primers containing the mutations. The mutants of mPHD and mDPPA3 were  
19 purified as same protocol.

20

## 21 **GST pull-down assay**

22 MagneGST™ Glutathione Particles (Promega) was used for the assay. 10 μg of the  
23 truncated GST-mUHRF1 were immobilized on the beads (10 μL) equilibrated with the binding  
24 buffer (20 mM Tris-HCl [pH 7.5], 150 mM NaCl, 1 mM DTT, 10% glycerol, 0.5 % Nonidet P-  
25 40). After the unbound proteins was washed-out by the 200 μL of the binding buffer at 3 times,  
26 10 μg of C-terminal fragment of mDPPA3 (residues 61-150 or 76-128W) was incubated with

1 the beads for 2 hours at 4 °C. After incubation, the unbound protein was washed three times  
2 using 200 µL of the binding buffer. The bound proteins were boiled for 2 minutes at 95 °C in  
3 an SDS sample buffer and analyzed by SDS-PAGE.

4

## 5 **ITC**

6 Microcal PEAQ-ITC (Malvern) was used for the ITC measurements. Wild-type and  
7 mutants of mPHD and mDPPA3 were dissolved in 10 mM HEPES (pH 7.5) buffer containing  
8 150 mM NaCl and 0.25 mM tris(2-carboxyethyl)phosphine. All measurements were carried  
9 out at 293K. The data were analyzed with Microcal PEAQ-ITC analysis software using a one-  
10 site model. For each interaction, at least three times independent titration experiments were  
11 performed to show the dissociation constants with presenting the mean standard deviations.

12

## 13 **NMR**

14 All NMR experiments were performed on Bruker BioSpin Avance III HD  
15 spectrometers with TCI triple-resonance cryogenic probe-head with basic <sup>1</sup>H resonance  
16 frequencies of 500.13, 800.23 and 950.15 MHz. Three-dimensional (3D) spectra for main-  
17 chain signal assignments: HNCACB, HN(CO)CACB, HNCA, HN(CO)CA, HNCO and  
18 HN(CA)CO, and for side-chain signal assignments: HBHA(CBCACO)NH, H(CCO)NH,  
19 CC(CO)NH, HCCH-TOCSY and (H)CCH-TOCSY, for structure analysis: <sup>1</sup>H-<sup>13</sup>C NOESY-  
20 HSQC, and <sup>1</sup>H-<sup>15</sup>N NOESY-HSQC spectra were acquired at 293 K for 0.66 mM [<sup>13</sup>C, <sup>15</sup>N]-  
21 mPHD-mDPPA3 fusion protein dissolved in PBS buffer (pH 7.0) containing 1 mM DTT and  
22 5% D<sub>2</sub>O. The spectral widths (the number of total data points) of each spectrum were 24 ppm  
23 (2,048) for the <sup>1</sup>H dimension, and 30 ppm (256) for the <sup>15</sup>N dimension. All 3D spectra except  
24 for <sup>1</sup>H-<sup>13</sup>C NOESY-HSQC were acquired by means of non-uniform sampling (NUS) to  
25 randomly reduce t1 and t2 time-domain data points typically around to 25%. The uniformly  
26 sampled data were reconstructed from the raw NMR data according to the sparse sampling

1 schedules using several techniques such as IST, SMILE, MDD and IRLS(39–41). Chemical  
2 shift perturbation experiments were performed by recording 2D  $^1\text{H}$ - $^{15}\text{N}$  HSQC spectra of 30  
3 mM [ $^{15}\text{N}$ ]-mPHD dissolved in the same buffer. All NMR spectra were processed using  
4 NMRPipe(42). For the NMR analysis, an integrated package of NMR tools named MagRO-  
5 NMRViewJ, version 2.01.39 [the upgraded version of Kujira(43)], on NMRView(44) was used  
6 for automated signal identification and noise filtration using convolutional neural networks  
7 [CNNfilter(45)]. The filtered signal lists were applied to calculations for automated signal  
8 assignments by FLYA(46) and then the signal assignments were used for prediction of dihedral  
9 angles by TALOS+(47), and automated NOE assignments and structure calculation by  
10 CYANA(48). Finally, water refinement calculations by AMBER12 were performed for the  
11 lowest energy structures (20 models).

12 More details for the structure calculation are shown as below. We ran fully automated  
13 peak picking and noise filtration on MagRO for all spectra required for FLYA calculation using  
14 structure calculation mode with peak tables for the spectra:  $^1\text{H}$ - $^{15}\text{N}$  HSQC, HNC0, HN(CA)CO,  
15 HNCA, HN(CO)CA, CBCA(CO)NH, HNCACB, HCCH-TOCSY,  $^{15}\text{N}$ -edited NOESY, and  
16  $^{13}\text{C}$ -edited NOESY. After the 1st FLYA calculation, ~80% of backbone and ~60% side-chain  
17 signals were automatically assigned. These assigned chemical shifts were imported into  
18 MagRO from the output flya.tab file, according to the following criteria: among 20 assigned  
19 chemical shift tables described in flya.tab, cut-off of value 80% was set to eliminate poorly  
20 populated assigned chemical shifts after the final consolidation stage, and several proton  
21 signals such as Thr-OH, Ser-OH, His- $\text{H}_{\text{e}2}$ , His- $\text{H}_{\text{d}1}$ , and Phe- $\text{H}_{\text{z}}$  were also neglected. Following  
22 by visual inspection of the assigned data using 3D spectra such as H(CCCO)NH, CC(CO)NH  
23 and HBHA(CO)NH to confirm and correct the assignments, 2<sup>nd</sup> FLYA calculation was  
24 performed with the confirmed assigned chemical shifts to assign the remaining signals.  
25 TALOS+ calculation was performed using chemical shifts for  $^1\text{HN}$ ,  $^{15}\text{N}$ ,  $^{13}\text{C}_{\text{a}}$ ,  $^{13}\text{C}_{\text{b}}$  and  $^{13}\text{CO}$  to  
26 predict the dihedral angles ( $\phi$  and  $\psi$ ) of backbone. MagRO automatically converted the



1 predicted dihedral angles to talosp.aco restrain file in the CYANA format except for the data  
2 which may not be trustful: low predicted order parameter (less than 0.8) and worse class  
3 annotated as "Warn" or "Dyn", as well as with setting a minimum angle ( $\pm 20$ -deg). In the  
4 CYANA calculation, we applied 6 upper- and lower-limit distance constraints (total 82) to form  
5 tetrahedral coordinates for each  $Zn^{2+}$  atom, which was topologically linked with pseudo  
6 residues "PL" and "LL2". We assumed that the members of residues involved in the three Zn-  
7 finger coordinates from the typical fashion found in PHD domains, namely site1: C-C-C-C,  
8 site2: C-C-C-C and site3: C-C-H-C.

9 For the obtained CYANA structures (20 models) with the lowest target function,  
10 implicit water refinement calculations were performed by AMBER12. Dihedral angle  
11 constraints (derived from TALOS+ prediction) and distance constraints including additional  
12 chirality and backbone omega angle constraints were converted for AMBER format using the  
13 SANDER tool(49). The distance constraints exported by CYANA (final.upl) were exclusively  
14 used (purely derived from experimental NOE data). Metal coordinate parameters, ZAFF.prep  
15 and ZAFF.frcmod, were appended to the standard force field, ff99SB, for the three zinc-finger  
16 sites according to the AMBER tutorial  
17 [<http://ambermd.org/tutorials/advanced/tutorial20/ZAFF.htm>]. In each initial stage of the  
18 refinement, 500 steps of energy minimization (250 steps of steepest gradient, followed by 250  
19 steps of conjugate gradient decent) without electro-static energy and NMR constrain terms.  
20 The calculation was followed by a short molecular dynamics calculation (total 100 psec, time  
21 step 1.0 fsec, using SHAKE algorism for bond and angle stabilization) using electro-static  
22 energy based on generalized born model (salt concentration: 0.1 M, disabled Surface  
23 Accessibility (SA) function, electro-static potential radius cut-off: 18 Å) and NMR constrain  
24 terms. After the temperature was gradually increased from 0 to 300 K for 1,500 steps, dynamic  
25 calculation at 300 K was ran for remaining steps. In the final stage of the refinement, 2,000  
26 steps of energy minimization were performed with the same energy terms.

1  $^1\text{H}$ - $^{15}\text{N}$  heteronuclear NOE (het-NOE) spectra of mPHD-mDPPA3 were measured  
2 with and without  $^1\text{H}$  saturation applied before the start of the measurement(50). The het-NOE  
3 values were calculated as ratios of the signal intensities of the two spectra. For signal intensity  
4 of each residue, the experimental error was estimated from the target signal around noise  
5 amplitude.

6

## 7 **CD**

8 Far-UV circular dichroism (CD) spectra were obtained using a JASCO J-720W  
9 model spectrometer. All samples were prepared to a concentration of 20  $\mu\text{M}$ . Measurements  
10 were performed at 293K with a path length of 1 mm.

11

## 12 ***In vitro* ubiquitination assay**

13 Protein expression in *E.Coli* and purification of mouse UBA1 (E1), human UBE2D3 (E2),  
14 mouse UHRF1 (E3), C-terminal FLAG tagged-H3<sub>1-37W</sub> and ubiquitin were performed  
15 according to the previous reports(9). Ubiquitination reaction mixtures contained 100  $\mu\text{M}$   
16 ubiquitin, 200 nM E1, 6  $\mu\text{M}$  E2, 3  $\mu\text{M}$  E3, 5 mM ATP, and 10  $\mu\text{M}$  C-terminal FLAG tagged-  
17 H3<sub>1-37W</sub> in the presence and absence of 10  $\mu\text{M}$  mDPPA3<sub>76-128W</sub> in ubiquitination reaction buffer  
18 (50 mM HEPES [pH 7.5], 150 mM NaCl, 5 mM MgCl<sub>2</sub>, 0.05% Triton X-100, 2 mM DTT).  
19 The mixture was incubated at 30°C for 3 hrs, and the reaction was stopped by adding 3  $\times$  SDS  
20 loading buffer. The reaction was analyzed by SDS-PAGE, followed by Western blotting using  
21 1/5,000 diluted anti-FLAG antibody (Cell Signaling Technology, #2368).

22

## 23 ***Xenopus* interphase egg extracts and purification of chromatin**

24 *Xenopus laevis* was purchased from Kato-S Kagaku and handled according to the  
25 animal care regulations at the University of Tokyo. Interphase egg extracts were prepared as  
26 described previously(11). Unfertilized *Xenopus* eggs were dejellied in 2.5% thioglycolic acid-

1 NaOH (pH 8.2) and were washed three times in  $0.2 \times$  MMR buffer (5 mM HEPES-KOH [pH  
2 7.6], 0.1 M NaCl, 2 mM KCl, 0.1 mM EDTA, 1 mM MgCl<sub>2</sub>, 2 mM CaCl<sub>2</sub>). After activation in  
3  $1 \times$ MMR supplemented with 0.3  $\mu$ g/mL calcium ionophore, eggs were washed 4 times with EB  
4 buffer (10 mM HEPES-KOH [pH 7.7], 100 mM KCl, 0.1 mM CaCl<sub>2</sub>, 1 mM MgCl<sub>2</sub>, 50 mM  
5 sucrose). Packed eggs were crushed by centrifugation (BECKMAN, Avanti J-E, JS13.1  
6 swinging rotor) for 20 min at  $18,973 \times g$ . Egg extracts were supplemented with 50  $\mu$ g/mL  
7 cycloheximide, 20  $\mu$ g/mL cytochalasin B, 1 mM DTT, 2  $\mu$ g/mL aprotinin and 50  $\mu$ g/mL  
8 leupeptin and clarified for 20 min at  $48,400 \times g$  (Hitachi, CP100NX, P55ST2 swinging rotor).  
9 The cytoplasmic extracts were aliquoted and stored at  $-80^{\circ}\text{C}$ . Chromatin purification after  
10 incubation in egg extracts was performed as previously described with modifications. Sperm  
11 nuclei were incubated in egg extracts supplemented with an ATP regeneration system (20 mM  
12 phosphocreatine, 4 mM ATP, 5  $\mu$ g/mL creatine phosphokinase) at 3000-4000 nuclei/ $\mu$ L at  $22^{\circ}\text{C}$ .  
13 Aliquots (15  $\mu$ L) were diluted with 150-200  $\mu$ L chromatin purification buffer (CPB; 50 mM  
14 KCl, 5 mM MgCl<sub>2</sub>, 20 mM HEPES-KOH [pH 7.7]) containing 0.1% NP-40, 2% sucrose and  
15 2 mM NEM. After incubating on ice for 5 min, extracts were layered over 1.5 mL of CPB  
16 containing 30% sucrose and centrifuged at  $15,000 \times g$  for 10 minutes at  $4^{\circ}\text{C}$ . Chromatin pellets  
17 were resuspended in  $1 \times$  Laemmli sample buffer, heated for 5 min and analyzed by SDS-PAGE.  
18 Recombinant Flag-tagged mDPPA3 was added to egg extracts at 400 nM.

19

## 20 **GST pull-down assay using *Xenopus* egg extracts**

21 For GST pull-down experiments using *Xenopus* egg extracts, mouse DPPA3 cDNA  
22 was sub-cloned into a pGEX4T-3 plasmid using In-Fusion (Clontech) according to the  
23 manufacturer's instructions. GST or GST-mDPPA3 proteins were expressed in *E.coli* BL21  
24 (BL21-CodonPlus) by the addition of 0.1 mM IPTG to media followed by incubation for 12 h  
25 at  $20^{\circ}\text{C}$ . Bacteria cells were harvested and resuspended in lysis buffer (20 mM HEPES-KOH  
26 [pH 7.6], 0.5 M NaCl, 0.5 mM EDTA, 10% glycerol, 1 mM DTT) supplemented with 0.5%

1 NP-40 and protease inhibitors and were then disrupted by sonication on ice. After the cell debris  
2 were removed by centrifugation, the recombinant proteins were immobilized on Glutathione  
3 Sepharose 4B resin (Cytiva) by incubation for 2 h at 4 °C. After the unbound proteins was  
4 washed-out by the lysis buffer, interphase egg extracts were incubated with the beads for 2  
5 hours at 4 °C. After incubation, the beads were washed four times with CPB containing 2%  
6 sucrose, 0.5 M KCl and 0.1% Triton X-100. The washed beads were resuspended in 20 µL of  
7 2×Laemmli sample buffer and 20 µL of 1×Laemmli sample buffer, boiled for 5 min at 100 °C,  
8 and analyzed by immunoblotting.

9 For FLAG-tagged protein expression in insect cells, 3×FLAG-tagged mDppa3 WT or  
10 mutants were sub-cloned into pVL1392 vector. Baculoviruses were produced using a BD  
11 BaculoGold Transfection Kit and a BestBac Transfection Kit (BD Biosciences), following the  
12 manufacturer's protocol. Proteins were expressed in Sf9 insect cells by infection with viruses  
13 expressing 3×FLAG-tagged mDPPA3 WT or its mutants for 72 h at 27°C. Sf9 cells from a 750  
14 mL culture were collected and lysed by resuspending them in 30 mL lysis buffer, followed by  
15 incubation on ice for 10 min. A soluble fraction was obtained after centrifugation of the lysate  
16 at 15,000 × g for 15 min at 4°C. The soluble fraction was incubated with 250 µL anti-FLAG  
17 M2 affinity resin equilibrated with lysis buffer for 4 hours at 4°C. The beads were collected  
18 and washed with 10 mL wash buffer and then with 5 mL EB (20 mM HEPES-KOH [pH 7.5],  
19 100 mM KCl, 5 mM MgCl<sub>2</sub>) containing 1 mM DTT. Each recombinant protein was eluted  
20 twice in 250 µL EB containing 1 mM DTT and 250 µg/mL 3×FLAG peptide (Sigma-Aldrich).  
21 Eluates were pooled and concentrated using a Vivaspin 500 (GE Healthcare).

22

### 23 **Cell culture and cell line generation**

24 Dppa3\_KO/UHRF1-GFP mESCs were described previously(35, 51) and were  
25 cultivated in Dulbecco's Modified Eagle's Medium-High Glucose supplemented with  
26 homemade recombinant LIF(52), 16% Fetal Bovine Serum (FBS, Sigma) 0.1 mM β-

1 mercaptoethanol ready to use, (Life Technologies), 2 mM L-glutamine, respectively 100 U/mL  
2 and 100 µg/mL of Pen/Strep (Sigma), 1x non-essential amino acids (Sigma) and with 2i  
3 inhibitors (1 µM PD32591 and 3 µM CHIR99021, Axon Medchem). Cells were cultured in  
4 gelatine (0.2%) coated Corning dishes, 37°C, 5% CO<sub>2</sub> incubator and gently dissociated for  
5 passaging 1:8 ratio every second day with Stem Pro Accutase (Gibco). Cells were washed with  
6 Dulbecco's Phosphate Buffer Saline cell culture grade.

7 To generate stable doxycycline inducible Dppa3 mESC lines, 400,000 of  
8 Dppa3\_KO/UHRF1-GFP mESCs were seeded into one well of a 6-well plate 4 hours before  
9 transfection. Then cells were transfected with equimolar amounts of pSBtet-3xFLAG-  
10 Dppa3\_wt-mScarlet-PuroR or pSBtet-3xFLAG-Dppa3\_mutants-mScarlet-PuroR or pSBtet-  
11 3xFLAG-B.Taurus Dppa3-mScarlet-PuroR and the Sleeping Beauty transposase,  
12 pCMV(CAT)T7-SB100(53) (Addgene plasmid #34879) vector using Lipofectamine 3000  
13 (Thermo Fisher Scientific) according to manufacturer's instructions. 48 hours after transfection,  
14 cells were seeded onto p100 plates into clonal density under puromycin selection with a  
15 concentration of 1 µg/mL for 7 days. After the seventh day selection, colonies with mScarlet  
16 signal under induction of doxycycline (1 µg/mL) were picked and mixed for further analyses.  
17 The stable cell lines were kept in puromycin selection of 1 µg/mL starting two weeks after  
18 expansion.

19

## 20 **Sleeping beauty constructs**

21 To generate inducible mouse Dppa3 mutants and Bos Taurus Dppa3 expression  
22 constructs, the sequences coding for mDppa3 mutants, including R104A, R89/V90A,  
23 L91A/V94G, M102/E109P, and Bos Taurus Dppa3 were synthesized as gBlocks (IDT,  
24 Coralville, IA, USA) and inserted into the pSB\_Avi\_3xFLAG\_insert\_mScarlet\_Puro vector  
25 (linearized by AsiSI and NotI) using Gibson assembly based on protocol instructions of 2×HiFi  
26 master mix (New England Biolabs). The correct constructs were selected upon Sanger

1 Sequencing results (Eurofins).

2

### 3 **Cellular fractionation and western blot**

4 Cell fractionation was performed as described previously with minor  
5 modifications(54). Approximately  $1 \times 10^7$  ESCs were resuspended in 100  $\mu$ L of buffer A (10  
6 mM HEPES [pH 7.9], 10 mM KCl, 1.5 mM MgCl<sub>2</sub>, 0.34 M sucrose, 10% glycerol, 0.1% Triton  
7 X-100, 1 mM DTT, 1 mM phenylmethylsulfonyl fluoride (PMSF),  $1 \times$  mammalian protease  
8 inhibitor cocktail (PI; Roche)) and incubated for 5 min on ice. Nuclei were collected by  
9 centrifugation (5 min,  $1300 \times g$ , 4 °C) and the cytoplasmic fraction (supernatant) was cleared  
10 again by centrifugation (15 min,  $20,000 \times g$ , 4 °C). Nuclei were washed once with buffer A and  
11 resuspended in 100  $\mu$ L of buffer A. Cytoplasmic and nuclear fractions were supplemented with  
12  $4 \times$  Laemmli buffer and boiled (10 min, 95 °C).

13 Western blots were performed with the following antibodies: anti-alpha-Tubulin  
14 (monoclonal; 1:2000; Sigma, T9026), rabbit anti-H3 (polyclonal; 1:5000; Abcam, ab1791),  
15 mouse anti-GFP (monoclonal; 1:5000; Roche), goat anti-rabbit HRP (polyclonal; 1:5000;  
16 BioRad), rabbit anti-mouse HRP (1:5000; Invitrogen, Cat # A27025).

17

### 18 **Live cell imaging**

19 Live cell experiments were conducted with a Nikon TiE microscope equipped with a  
20 Yokogawa CSU-W1 spinning disk confocal unit (pinhole size 50  $\mu$ m), together with a Andor  
21 Borealis illumination unit, (Andor ALC600 laser combiner (405 nm/ 488 nm/ 561 nm/ 640  
22 nm)). The images were acquired with an Andor IXON 888 Ultra EMCCD camera, with 100  
23  $\times/1.45$ NA oil immersion objective through the interface of the software NIS Elements (Version  
24 5.02.00) in Perfect Focus System with lasers at 488 nm for GFP, 561 nm for mScarlet and 640  
25 nm for Sir-DNA. For live cell imaging, 80,000 cells were seeded into one well of an 8 well  
26 glass bottom chamber slide (Ibidi) coated one day before with Geltrex Ready-to-Use (Thermo

1 Fisher Scientific). The next day, 1  $\mu$ M Sir-DNA (Spirochrome) for DNA staining was added  
2 into medium 1 h before live cell imaging. Images were acquired before and after 50 min upon  
3 doxycycline induction with the same laser power, acquisition time and gain.

4

## 5 **Protein sequence alignments**

6 Protein sequence alignments for UHRF1 and DPPA3 were performed using Jalview software  
7 ([www.jalview.org](http://www.jalview.org)) with sequences retrieved from Uniprot for UHRF1: (Q8VDF2\_Mus  
8 musculus; Q7TPK1\_Rattus norvegicus; G3RVG5\_Gorilla gorilla gorilla; Q96T88\_Homo  
9 sapiens; H2QF26\_Pan troglodytes; A0A3Q7TCY9\_Vulpes vulpes; A0A3Q7V1Z9\_Ursus  
10 arctos horribilis; A0A2U3VKN8\_Odobenus rosmarus divergence; A0A2Y9KPL3\_Enhydra  
11 lutris kenyoni; A7E320\_Bos Taurus) and DPPA3 (Q8QZY3\_Mus musculus; Q6IMK0\_Rattus  
12 norvegicus; G3RB81\_Gorilla gorilla gorilla; Q6W0C5\_Homo sapiens; H2Q5C8\_Pan  
13 troglodytes; A0A3Q7U513\_Vulpes vulpes; A0A3Q7W0Q7\_Ursus arctos horribilis;  
14 A0A2U3ZR98\_Odobenus rosmarus divergence; A0A2Y9IX83\_Enhydra lutris kenyoni;  
15 A9Q1J7\_Bos Taurus). Sequences are aligned with the multiple sequence alignment algorithm  
16 MAFFT (<http://mafft.cbrc.jp/alignment/software/>). The percentage protein identity conserved  
17 for both proteins is calculated through Pairwise alignment algorithm between Mus musculus  
18 and different species. The phylogenetic tree was generated with online tools,  
19 <https://www.genome.jp> (PhyML) and iTOL.

20

## 21 **RESULTS**

### 22 **Biochemical assay for determining essential regions for complex formation**

23 The C-terminal fragment of mDPPA3 is required for binding to mUHRF1(36). GST  
24 pull-down assays using truncated mouse UHRF1 showed that the PHD finger (residues 304–  
25 372: mPHD) was sufficient for binding to the C-terminal fragment of mDPPA3 (residues 61–  
26 150). After further optimization, we found that mDPPA3 residues 76–127, followed by an

1 additional Trp (mDPPA3<sub>76-128W</sub>), were sufficient to bind to the mPHD (Supplementary Figure  
2 S1A–C). This interaction was validated by isothermal titration calorimetry (ITC) and NMR  
3 spectroscopy. mDPPA3<sub>76-128W</sub> bound to mPHD with a  $K_D$  of 19.8 nM, which is stronger than  
4 the binding of the N-terminal tail of H3 ( $K_D$ : 1590 nM) and PAF15 ( $K_D$ : 3523 nM) to mPHD,  
5 which are well-known ligands of the UHRF1 PHD finger (Figure 1B and Supplementary Figure  
6 S2). The <sup>1</sup>H-<sup>15</sup>N heteronuclear single quantum coherence (HSQC) spectrum of <sup>15</sup>N-labeled  
7 mPHD titrated with non-labeled mDPPA3<sub>76-128W</sub> was markedly different from that of apo-  
8 mPHD, in which nearly all HSQC signals were shifted in the slow-exchange regime on the  
9 chemical shift timescale (Supplementary Figure S3A). The weighted averages of the <sup>1</sup>H and  
10 <sup>15</sup>N chemical shift differences ( $\Delta d$ ) between the apo- and holo-mPHD showed relatively large  
11 values for Glu333, Leu337, Met343, and Glu362 in mPHD (Supplementary Figure S3B). ITC  
12 data indicated that the L337A mutation in mPHD severely weakened the binding to mDPPA3<sub>76-</sub>  
13 <sub>128W</sub> with a  $K_D > 43,000$  nM (Figure 1B and Supplementary Figure S2) and also abolished the  
14 binding to the N-terminal tail of H3 and PAF15 (Supplementary Figure S2). The <sup>1</sup>H-<sup>15</sup>N HSQC  
15 spectrum of L337A mPHD showed that the mutation had a modest effect on the native  
16 conformation (Supplementary Figure S3C). Collectively, Leu337 of mPHD is commonly used  
17 as the interface for binding to mDPPA3, H3, and PAF15.

18

### 19 **Overall structure of mPHD in complex with mDPPA3**

20 To uncover the molecular mechanism by which mDPPA3 binds to mPHD with high  
21 affinity, we determined the structure of the complex using solution NMR analysis. As a target  
22 for structural analysis, we designed a chimeric protein, mDPPA3<sub>76-127</sub> was fused to the C-  
23 terminal region of mPHD (mPHD-mDPPA3). The <sup>1</sup>H-<sup>15</sup>N HSQC spectrum of the mPHD  
24 moiety in <sup>15</sup>N-labeled mPHD-mDPPA3 was superimposed on that of <sup>15</sup>N-labeled mPHD mixed  
25 with non-labeled mDPPA3<sub>76-127</sub>, validating that the chimeric protein has a binding mode  
26 similar to that of the isolated proteins (Supplementary Figure S3D).



1           The ensemble of the mPHD-mDPPA3 structures was well converged and showed a  
2 low average root mean square deviation (rmsd) of 0.40 Å for C $\alpha$  atom coordinates (Figure 1C,  
3 2A, Table 1). The mPHD moiety comprised of pre-PHD (residues 304–321) and core-PHD  
4 (residues 322–372) encompassing three zinc finger motifs (Zn1-3) and an anti-parallel  $\beta$ -sheet  
5 (Figure 1C). The residues 307–369 of the mPHD moiety were superimposed on the solution  
6 structure of apo-mPHD (PDB: 6VFO) with a C $\alpha$  rmsd of 3.1 Å (Supplementary Figure S4),  
7 indicating that the overall structure of mPHD did not change substantially upon binding of  
8 mDPPA3, except for a loop region, as mentioned later.

9           The  $^1\text{H}$ - $^{15}\text{N}$  HSQC spectrum of mDPPA3 in the free state showed sharp signals in a  
10 very narrow range of  $^1\text{H}$  chemical shifts corresponding to a randomly coiled state, indicating  
11 the unstructured conformation of apo-mDPPA3 (Supplementary Figure S3E). Binding of  
12 mPHD induced two  $\alpha$ -helices in mDPPA3: a short  $\alpha$ -helix,  $\alpha\text{S1}$  (residues 90–95) and a long  $\alpha$ -  
13 helix  $\alpha\text{L2}$  (residues 97–118), which are connected via a short turn, resulting in an ‘L’ shaped  
14 motif in mDPPA3 (Figure 1C). The helical structure induced upon binding of mPHD was  
15 further experimentally confirmed by circular dichroism (CD) spectrum analysis. The CD  
16 spectrum of mPHD mixed with mDPPA3 showed a negative peak at 222 nm, whereas this  
17 property was not observed in the spectra of mPHD and mDPPA3 alone (Figure 2B).  $^1\text{H}$ - $^{15}\text{N}$   
18 heteronuclear nuclear Overhauser effect (het-NOE) of  $^1\text{H}$ - $^{15}\text{N}$  labeled mPHD-mDPPA3, which  
19 is sensitive to local conformational flexibility on the picosecond to nanosecond timescale(55),  
20 was consistently high except for the residues on the N-terminal region of the mPHD moiety,  
21 residues 76–84, and the C-terminus of mDPPA3 (Figure 2A, C). The NMR structure showed  
22 that residues 85–118 of mDPPA3 in the complex were structurally well converged (Figure 2A)  
23 and ITC data demonstrated that mDPPA3<sub>85–118</sub> bound to mPHD with a  $K_D = 45$  nM, which is  
24 comparable to the binding affinity of mDPPA3<sub>76–128W</sub>, indicating that residues 85–118 of  
25 mDPPA3 were sufficient for binding to mPHD (Supplementary Figure S2). mDPPA3 provides  
26 a wide interface for contact with mPHD; the estimated contact area between the two proteins

1 was  $\sim 1360 \text{ \AA}^2$ , which comprises three parts: a  $^{88}\text{VRT}^{90}$  cassette, and  $\alpha\text{S1}$  and  $\alpha\text{L2}$  of mDPPA3  
2 (Figure 2D). In contrast, H3 and PAF15 bind to the human UHRF1 PHD finger with a contact  
3 area of  $\sim 400 \text{ \AA}^2$  (PDB: 3ASK) and  $\sim 360 \text{ \AA}^2$  (PDB: 6IIW), respectively. The contact areas of  
4 the complex structures are much smaller than those of the mPHD:mDPPA3 complex,  
5 supporting the stronger binding affinity between mPHD and mDPPA3.

6

### 7 **Recognition of the conserved VRT cassette in mDPPA3 by mPHD**

8 The  $^{88}\text{VRT}^{90}$  cassette of mDPPA3 adopted an extended conformation and fit into the  
9 shallow acidic groove on mPHD via an intermolecular anti-parallel  $\beta$  sheet (Figure 1C). The  
10 side chain of Val88 in the  $^{88}\text{VRT}^{90}$  cassette was surrounded by Leu336, Val357, Pro358,  
11 Glu360, and Trp363 of mPHD within van der Waals contacts (Figure 3A). The guanidino group  
12 of Arg89 in the cassette was located within a distance that enabled hydrogen bonding with the  
13 side-chain carboxyl groups of Asp339 and Glu362 of mPHD (Figure 3A). The side-chain  
14 hydroxyl and methyl groups of Thr90 in mDPPA3 interacted with mPHD differently: the  
15 methyl group formed hydrophobic interactions with Leu336, Leu337, and Val357 of mPHD,  
16 whereas the hydroxyl group was positioned within the hydrogen bond distance with the main  
17 chain amide of Ser93, indicating its function as a helix-cap for the N-terminus of the following  
18  $\alpha\text{S1}$  (Figure 3B). ITC data showed that the R89A/T90A mutations in the  $^{88}\text{VRT}^{90}$  cassette of  
19 mDPPA3 abolished its interaction with mPHD (Figure 3C). This interaction is supported by  
20 GST pull-down experiments with *in vitro* translated full-length mUHRF1 and GST-mDPPA3,  
21 which showed that the R89A/T90A mutations are sufficient to block the binding of mDPPA3  
22 to mUHRF1 (Figure 3D), indicating that the  $^{88}\text{VRT}^{90}$  cassette in mDPPA3 plays a critical role  
23 in binding to mPHD.

24 The  $^{88}\text{VRT}^{90}$  cassette of mDPPA3 was well-conserved in the N-terminal sequences of  
25 PAF15 ( $^1\text{VRT}^3$ ) and H3 ( $^1\text{ART}^3$ ). Although the  $^{88}\text{VRT}^{90}$  cassette of mDPPA3 is not located at  
26 its N-terminal end, the cassette was recognized by the shallow acidic groove of mPHD, which

1 is used for PAF15/H3-binding (Figure 3E–G). Notably, compared with the PHD moiety  
2 structure in the complexes with PAF15/H3 and mDPPA3, the conformation of loop residues  
3 356–364 (hereafter loop<sup>PHD</sup>) in mPHD was markedly different (Figure 3H). In the complex  
4 with PAF15/H3, loop<sup>PHD</sup> functions as a wall to recognize the N-terminal amino group of  
5 PAF15/H3 by hydrogen bonding using the main chain carbonyl oxygen of Glu355 (Figure 3F,  
6 G). In contrast, in the complex with mDPPA3, loop<sup>PHD</sup> is shifted outward away from the amide  
7 nitrogen of Val88 of mDPPA3, resulting in disruption of the hydrogen bond between the amide  
8 nitrogen in mDPPA3 and the main-chain carbonyl oxygen of Glu366 (corresponding to residue  
9 Glu355 in humans) in the loop<sup>PHD</sup> of mPHD (Figure 3H). The results indicate that loop<sup>PHD</sup> has  
10 an intrinsically flexible capability to accommodate the VRT cassette of mDPPA3. The  
11 structural rearrangement of loop<sup>PHD</sup> permits the peptide bond moiety between Arg87–Val88 to  
12 enter the groove (Figure 3E, H). The side-chain conformation of Arg89 of mDPPA3 in the  
13 complex with mPHD was different from that of Arg2 of H3/PAF15 (Figure 3E–G). Given that  
14 ITC data for the R89A mutation of mDPPA3 showed an ~18-fold decrease in binding affinity  
15 to mPHD ( $K_D = 361$  nM; Figure 3C and Supplementary Figure S2), the Arg89 guanidino group  
16 of mDPPA3 interacts with the acidic surface of mPHD.

17

### 18 **Binding mode of two-helices in mDPPA3 to mPHD**

19 In addition to the <sup>88</sup>VRT<sup>90</sup> cassette, mDPPA3 utilizes two  $\alpha$ -helices,  $\alpha$ S1 and  $\alpha$ L2, to  
20 bind to mPHD. The  $\alpha$ S1 of mDPPA3 forms a small hydrophobic cluster composed of the side  
21 chain methyl groups of Leu91, Val94, and Leu95, of which Leu91 and Val94 interact with the  
22 hydrophobic patch of mPHD comprising Leu337 and Ala344 (Figure 4A). As mentioned before,  
23 the L337A mutation in mPHD largely impaired the interaction with mDPPA3; similarly, the  
24 L91A/V94A mutations in mDPPA3 also reduced the binding affinity to mPHD with a  $K_D$  of  
25 1084 nM (Figure 4B), indicating that  $\alpha$ S1 contributes to stable complex formation.

26  $\alpha$ L2 of mDPPA3, comprising residues 99–118, was embedded into a concave surface

1 between the pre- and core-PHD domains (Figure 2D). Notably, the introduction of the helix  
2 breaking residue M102P/E109P mutations, or truncation of  $\alpha$ L2 residues 76–106 in mDPPA3  
3 resulted in a significant reduction in binding to mPHD, indicating that the formation of  $\alpha$ L2 is  
4 critical for interaction with mPHD (Figure 4B and Supplementary Figure S2). Interestingly, the  
5 Arg104 guanidino group on  $\alpha$ L2 in mDPPA3 was deeply buried in the binding interface of the  
6 complex, in which the side chain formed hydrogen bonds with the main chain carbonyl oxygens  
7 of Lys320 and Cys321 in the pre-PHD domain (Figure 4A). Ile108 and Arg111 of mDPPA3  
8 also interacted with Cys341 and Asp342 of the core-PHD domain, indicating that  $\alpha$ L2 bridges  
9 the pre- and core-PHD domains. Although mutations of Ile108 and Arg111 of mDPPA3 had a  
10 limited effect on binding to mPHD (Figure 4B and Supplementary Figure S2), the R104A  
11 mutation significantly reduced the binding affinity to mPHD (Figure 4B). GST pull-down  
12 experiments demonstrated that the L91A/V94A mutation in  $\alpha$ S1 reduced the binding of GST-  
13 mDPPA3 to full-length mUHRF1 modestly (Figure 4C), showing a limited effect on full-length  
14 proteins. In contrast, the M102P/E109P and R104A mutations in  $\alpha$ L2 of mDPPA3 markedly  
15 reduced binding to mUHRF1 (Figure 4C), indicating that  $\alpha$ L2 of mDPPA3 plays a pivotal role  
16 in complex formation with full-length proteins.

17

### 18 **Mutational analyses of interaction interface of DPPA3 with UHRF1 in *Xenopus* egg** 19 **extracts and mESCs**

20 To test the function of the DPPA3 mutants, we measured their ability to inhibit  
21 UHRF1-dependent maintenance of DNA methylation in *Xenopus* egg extracts. We compared  
22 the inhibitory activity of GST-mDPPA3 (wild-type) with that of the R89A/T90A, L91A/V94A,  
23 M102P/E109P, and R104A mutants. Our results showed that wild-type mDPPA3 inhibited the  
24 chromatin recruitment of UHRF1 and DNA methylation; in contrast, the R89A/T90A mutant  
25 showed a severely impaired inhibitory effect (Figure 5A). Concordant with the ITC data and  
26 GST-pull down assay, the L91A/V94A mutant was ineffective in inhibiting UHRF1 (Figure

1 5A). Additionally, mutants linked to the  $\alpha$ L2 helix structure (M102P/E109P and R104A) were  
2 unable to inhibit UHRF1 chromatin loading (Figure 5A).

3 To further examine the importance of the interaction interface of DPPA3 and UHRF1,  
4 we analyzed chromatin displacement and nucleocytoplasmic translocation of UHRF1 by  
5 inducing the expression of DPPA3 mutants in mouse embryonic stem cells (mESCs). We  
6 generated inducible mDPPA3-mScarlet expression cassettes harboring mutations R89A/T90A,  
7 L91A/V94A, R104A, and M102P/E109P. After introducing these expression cassettes into  
8 DPPA3 knock out/UHRF1-GFP (D3KO/U1GFP) mESCs, we used live-cell imaging to observe  
9 the localization of UHRF1-GFP (Figure 5B). Wild-type mDPPA3 caused chromatin  
10 displacement and nucleocytoplasmic translocation of UHRF1-GFP. In contrast, the mDPPA3  
11 mutants failed to efficiently re-localize UHRF1-GFP (Figure 5B). Furthermore, biochemical  
12 fractionation experiments showed that UHRF1-GFP was detected in the cytoplasm after  
13 induction of wild-type mDPPA3, whereas the mDPPA3 mutants showed low activity for  
14 UHRF1-GFP displacement and export to the cytoplasm. (Figure 5C). The L91A/V94A  
15 mutation of mDPPA3 had a more severe effect on mESCs than on *Xenopus* egg extracts.

16 Next, we examined the evolutionary conservation of the DPPA3-UHRF1 interaction  
17 interface. Although UHRF1 is highly conserved, phylogenetic analysis of DPPA3 showed the  
18 prevalence of two divergent groups: group 1, with more than 24.6% similarity (*Mus musculus*,  
19 *Rattus norvegicus*, *Gorilla gorilla*, *Homo sapiens*, and *Pan troglodytes*) and group 2 which  
20 showed less than 18.6% identity (*Vulpes vulpes*, *Ursus arctos horribilis*, *Odobenus rosmarus*,  
21 *Enhydra lutris kenyoni*, and *Bos taurus*) (Supplementary Figure S5A), suggesting rapid  
22 evolution of DPPA3. This is consistent with the observation that DPPA3 has recently evolved  
23 in mammals and does not appear to have catalytic activity (Mulholland et al., 2020). Notably,  
24 the VRT cassette of DPPA3, a central element in the interaction with UHRF1, was highly  
25 conserved except in *Bos taurus* (Supplementary Figure S5B), which could not displace UHRF1  
26 in mESCs from chromatin (Figure 5B).

1           Taken together, the results of the functional assays indicate that the key residues of  
2 mDPPA3 identified in our NMR structure of the complex are important for UHRF1 regulation.

3

#### 4 **DISCUSSION**

5           The PHD finger is a well-known reader domain for post-translational modifications  
6 of histone H3(56). Several structural studies of PHD fingers in complex with their ligands have  
7 revealed an N-terminal recognition rule for ligand recognition that can be applied to the vast  
8 majority of PHD fingers. PHD fingers have a shallow acidic groove for recognition of the N-  
9 terminus of ligands, in which the amino group of the first amino acid residue in the ligand  
10 forms hydrogen bond (s) with the PHD finger, resulting in a binding affinity with  $K_D$  in the  $\mu\text{M}$   
11 range. Our NMR solution structure showed that mDPPA3 binds to mPHD via multifaceted  
12 interactions, utilizing the VRT cassette and two  $\alpha$ -helices. The  $^{88}\text{VRT}^{90}$  cassette of mDPPA3 is  
13 not located at the N-terminal end. However, the cassette was recognized by the shallow acidic  
14 groove of mPHD in a similar manner to the N-terminus of  $^1\text{ART}^3$  in H3 and  $^1\text{VRT}^3$  in PAF15.  
15 This binding is reinforced by the two  $\alpha$ -helices unique to mDPPA3, resulting in high-affinity  
16 binding to mPHD ( $K_D = 19.8 \text{ nM}$ ). Although the N-terminus recognition rule does not apply to  
17 mDPPA3 binding to mPHD, stable complex formation is ensured by the multifaceted  
18 interaction provided by mDPPA3. The VRT cassette of mDPPA3 is well conserved among  
19 various species (Supplementary Figure S5), suggesting that binding of the VRT cassette to the  
20 UHRF1 PHD finger while disregarding the N-terminus recognition rule is a common molecular  
21 mechanism for the complex formation of DPPA3 and UHRF1.

22           The VRT cassette and  $\alpha\text{S1}$  helix of DPPA3 identified in the NMR structure were  
23 relatively conserved between species, whereas the  $\alpha\text{L2}$  helix was less conserved and had a short  
24 insertion in the group 2 species of the DPPA3 family (Supplementary Figure S5B). AlphaFold2  
25 predicted that the corresponding regions in humans (UniProt: Q6W0C5) and rats (UniProt:  
26 Q6IMK0) show a long helical structure, suggesting that the formation of the  $\alpha\text{L2}$  in the DPPA3

1 family is structurally conserved.

2 In general, a conventional PHD finger consists of one core-PHD domain, including  
3 two zinc fingers(56). In contrast, the UHRF1 PHD finger contains a pre-PHD domain, which  
4 provides an additional binding surface for mDPPA3. Protein sequence analysis of UHRF1  
5 comparing 10 different species showed that UHRF1 was highly conserved during mammalian  
6 evolution (>40% similarity) (Supplementary Figure S5A). In particular, the UHRF1 pre-PHD  
7 and PHD domains were very similar (61.1%) (Supplementary Figure S5B), suggesting the  
8 conservation of the domain in the UHRF1 family. The  $\alpha$ L2 of mDPPA3 is embedded in the  
9 concave surface formed between the pre- and core-PHD domains in mPHD. Breaking the  
10 folding of the  $\alpha$ L2 helix severely impaired the binding affinity to mPHD, indicating that  $\alpha$ L2  
11 formation by mDPPA3 is crucial for its interaction with mPHD. Thus, the unique structural  
12 features of mPHD, consisting of pre- and core-PHDs, and of mDPPA3 with the two helices for  
13 enforcing VRT cassette binding ensure highly specific structural complementarity for complex  
14 formation. As a consequence, DPPA3 does not bind to the conventional PHD finger that lacks  
15 the pre-PHD domain.

16 The binding of the UHRF1 PHD domain to H3 is involved in its chromatin localization  
17 (29, 35, 36). The shallow acidic groove on mPHD is a common binding platform for mDPPA3  
18 and H3, implying that DPPA3-binding to mPHD competes with H3-binding. In addition to the  
19 shallow acidic groove, mDPPA3 utilizes two helices for binding to mPHD, increasing its  
20 binding affinity. Thus, the molecular mechanism by which mDPPA3 inhibits chromatin binding  
21 of UHRF1 includes the preferential binding of mDPPA3 to the UHRF1 PHD finger. Studies  
22 have shown that ubiquitination of H3 and PAF15 by UHRF1 requires the recognition of their  
23 N-terminus by the PHD finger(9, 11, 12). Indeed, mDPPA3 inhibited the ubiquitination of H3  
24 catalyzed by UHRF1 *in vitro* (Supplementary Figure S6), suggesting that DPPA3 inhibits  
25 chromatin binding of UHRF1 and represses the E3-ligase activity of UHRF1 in cells. The  
26 binding mode of DPPA3 to UHRF1 is unique and DPPA3-binding explicitly inhibits chromatin

1 loading of UHRF1. UHRF1 is overexpressed in many cancer cells and downregulation of  
2 UHRF1 in these cells leads to reactivation of tumor suppressor gene expression(57).  
3 Overexpression of DPPA3 leads to tumor differentiation in hepatocellular carcinoma in which  
4 UHRF1 nuclear translocation is impeded(58). Thus, our structural analysis of the UHRF1 PHD  
5 in complex with DPPA3 may provide a framework for the design of new anticancer drugs.  
6 Peptide-like inhibitors that mimic the  $\alpha$ L2 of DPPA3 and specifically bind to the concave  
7 surface between pre- and core-PHD domains inhibit excessive UHRF1 in cancer cells.  
8



1 **ACCESSION NUMBERS**

2 NMR data and refined coordinate was deposited in the Protein Data Bank with  
3 accession code 7XGA and Biological Magnetic Resonance Bank with accession code  
4 bmr36483. Supplementary Information is linked to the online version of the paper at  
5 [www.nature.com/nature](http://www.nature.com/nature). Correspondence should be addressed to [aritak@yokohama-cu.ac.jp](mailto:aritak@yokohama-cu.ac.jp).  
6 Source data are provided with this paper.

7

8 **Supplementary Data statement**

9

10 **FUNDING**

11 This study was supported by MEXT/JSPS KAKENHI (JP18H02392, JP19H05294 and  
12 JP19H05741 to K.A., and 19H05285 and 21H00272 to A.N.), PRESTO (14530337) from JST  
13 to K.A., Takeda Science Foundation (1871140003) to K.A., the grant for 2021–2023 Strategic  
14 Research Promotion (No. SK201904) of Yokohama City University to K.A., Research  
15 Development Fund of Yokohama City University to T.K. and the Deutsche  
16 Forschungsgemeinschaft (DFG grant SFB 1064/A17 # 213249687 to H.L.).

17

18 **CONFLICT OF INTEREST**

19 The authors declare no competing interests.

20

21

22

23

## 1 REFERENCES

- 2 1. Schübeler,D. (2015) Function and information content of DNA methylation. *Nature*, **517**,
- 3 321–6.
- 4 2. Zeng,Y. and Chen,T. (2019) DNA Methylation Reprogramming during Mammalian
- 5 Development. *Genes 2019, Vol. 10, Page 257*, **10**, 257.
- 6 3. Greenberg,M.V.C. and Bourc’his,D. (2019) The diverse roles of DNA methylation in
- 7 mammalian development and disease. *Nature Reviews Molecular Cell Biology 2019*
- 8 *20:10*, **20**, 590–607.
- 9 4. Seisenberger,S., Peat,J.R., Hore,T.A., Santos,F., Dean,W. and Reik,W. (2013)
- 10 Reprogramming DNA methylation in the mammalian life cycle: building and breaking
- 11 epigenetic barriers. *Philosophical transactions of the Royal Society of London. Series B,*
- 12 *Biological sciences*, **368**.
- 13 5. Bostick,M., Kim,J.K., Estève,P.-O., Clark,A., Pradhan,S. and Jacobsen,S.E. (2007)
- 14 UHRF1 plays a role in maintaining DNA methylation in mammalian cells. *Science (New*
- 15 *York, N.Y.)*, **317**, 1760–1764.
- 16 6. Sharif,J., Muto,M., Takebayashi,S., Suetake,I., Iwamatsu,A., Endo,T. a, Shinga,J.,
- 17 Mizutani-Koseki,Y., Toyoda,T., Okamura,K., *et al.* (2007) The SRA protein Np95
- 18 mediates epigenetic inheritance by recruiting Dnmt1 to methylated DNA. *Nature*, **450**,
- 19 908–912.
- 20 7. Smets,M., Link,S., Wolf,P., Schneider,K., Solis,V., Ryan,J., Meilinger,D., Qin,W. and
- 21 Leonhardt,H. (2017) DNMT1 mutations found in HSNIE patients affect interaction
- 22 with UHRF1 and neuronal differentiation. *Human Molecular Genetics*, **26**, 1522–1534.
- 23 8. von Meyenn,F., Iurlaro,M., Habibi,E., Liu,N.Q., Salehzadeh-Yazdi,A., Santos,F.,
- 24 Petrini,E., Milagre,I., Yu,M., Xie,Z., *et al.* (2016) Impairment of DNA Methylation
- 25 Maintenance Is the Main Cause of Global Demethylation in Naive Embryonic Stem
- 26 Cells. *Molecular Cell*, **62**, 848–861.

- 1 9. Nishiyama,A., Mulholland,C.B., Bultmann,S., Kori,S., Endo,A., Saeki,Y., Qin,W.,  
2 Trummer,C., Chiba,Y., Yokoyama,H., *et al.* (2020) Two distinct modes of DNMT1  
3 recruitment ensure stable maintenance DNA methylation. *Nature Communications*, **11**,  
4 1222.
- 5 10. Ishiyama,S., Nishiyama,A., Saeki,Y., Moritsugu,K., Morimoto,D., Yamaguchi,L.,  
6 Arai,N., Matsumura,R., Kawakami,T., Mishima,Y., *et al.* (2017) Structure of the Dnmt1  
7 Reader Module Complexed with a Unique Two-Mono-Ubiquitin Mark on Histone H3  
8 Reveals the Basis for DNA Methylation Maintenance. *Molecular Cell*, **68**, 350-360.e7.
- 9 11. Nishiyama,A., Yamaguchi,L., Sharif,J., Johmura,Y., Kawamura,T., Nakanishi,K.,  
10 Shimamura,S., Arita,K., Kodama,T., Ishikawa,F., *et al.* (2013) Uhrf1-dependent H3K23  
11 ubiquitylation couples maintenance DNA methylation and replication. *Nature*, **502**,  
12 249–53.
- 13 12. Qin,W., Wolf,P., Liu,N., Link,S., Smets,M., Mastra,F. La, Forné,I., Pichler,G., Hörl,D.,  
14 Fellingner,K., *et al.* (2015) DNA methylation requires a DNMT1 ubiquitin interacting  
15 motif (UIM) and histone ubiquitination. *Cell research*, **25**, 911–29.
- 16 13. Karg,E., Smets,M., Ryan,J., Forné,I., Qin,W., Mulholland,C.B., Kalideris,G., Imhof,A.,  
17 Bultmann,S. and Leonhardt,H. (2017) Ubiquitome Analysis Reveals PCNA-Associated  
18 Factor 15 (PAF15) as a Specific Ubiquitination Target of UHRF1 in Embryonic Stem  
19 Cells. *Journal of molecular biology*, **429**, 3814–3824.
- 20 14. X,M., Z,Z., Z,Z., C,L., Q,D., Q,H., Y,Y., Y,L., H,W. and B,Z. (2020) Kinetics and  
21 mechanisms of mitotic inheritance of DNA methylation and their roles in aging-  
22 associated methylome deterioration. *Cell research*, **30**, 980–996.
- 23 15. Nishiyama,A. and Nakanishi,M. (2021) Navigating the DNA methylation landscape of  
24 cancer. *Trends in Genetics*, **37**, 1012–1027.
- 25 16. Arita,K., Ariyoshi,M., Tochio,H., Nakamura,Y. and Shirakawa,M. (2008) Recognition of  
26 hemi-methylated DNA by the SRA protein UHRF1 by a base-flipping mechanism.

- 1        *Nature*, **455**, 818–821.
- 2    17. Avvakumov,G. V, Walker,J.R., Xue,S., Li,Y., Duan,S., Bronner,C., Arrowsmith,C.H. and  
3        Dhe-Paganon,S. (2008) Structural basis for recognition of hemi-methylated DNA by the  
4        SRA domain of human UHRF1. *Nature*, **455**, 822–825.
- 5    18. Hashimoto,H., Horton,J.R., Zhang,X., Bostick,M., Jacobsen,S.E. and Cheng,X. (2008)  
6        The SRA domain of UHRF1 flips 5-methylcytosine out of the DNA helix. *Nature*, **455**,  
7        826–829.
- 8    19. Arita,K., Isogai,S., Oda,T., Unoki,M., Sugita,K., Sekiyama,N., Kuwata,K., Hamamoto,R.,  
9        Tochio,H., Sato,M., *et al.* (2012) Recognition of modification status on a histone H3 tail  
10       by linked histone reader modules of the epigenetic regulator UHRF1. *Proceedings of the*  
11       *National Academy of Sciences*, **109**, 12950–12955.
- 12   20. Harrison,J.S., Cornett,E.M., Goldfarb,D., Darosa,P.A., Li,Z.M., Yan,F., Dickson,B.M.,  
13       Guo,A.H., Cantu,D. V., Kaustov,L., *et al.* (2016) Hemi-methylated DNA regulates DNA  
14       methylation inheritance through allosteric activation of H3 ubiquitylation by UHRF1.  
15       *eLife*, **5**.
- 16   21. Unoki,M., Nishidate,T. and Nakamura,Y. (2004) ICBP90, an E2F-1 target, recruits  
17       HDAC1 and binds to methyl-CpG through its SRA domain. *Oncogene*, **23**, 7601–7610.
- 18   22. Achour,M., Fuhrmann,G., Alhosin,M., Rondé,P., Chataigneau,T., Mousli,M., Schini-  
19       Kerth,V.B. and Bronner,C. (2009) UHRF1 recruits the histone acetyltransferase Tip60  
20       and controls its expression and activity. *Biochemical and Biophysical Research*  
21       *Communications*, **390**, 523–528.
- 22   23. Kim,J.K., Estève,P.O., Jacobsen,S.E. and Pradhan,S. (2009) UHRF1 binds G9a and  
23       participates in p21 transcriptional regulation in mammalian cells. *Nucleic Acids*  
24       *Research*, **37**, 493–505.
- 25   24. Hervouet,E., Lalier,L., Debien,E., Cheray,M., Geairon,A., Rogniaux,H., Loussouarn,D.,  
26       Martin,S. a., Vallette,F.M. and Cartron,P.F. (2010) Disruption of Dnmt1/PCNA/UHRF1

- 1 interactions promotes tumorigenesis from human and mice glial cells. *PLoS ONE*, **5**.
- 2 25. Zhang,Z.-M., Rothbart,S.B., Allison,D.F., Cai,Q., Harrison,J.S., Li,L., Wang,Y.,  
3 Strahl,B.D., Wang,G.G. and Song,J. (2015) An Allosteric Interaction Links USP7 to  
4 Deubiquitination and Chromatin Targeting of UHRF1. *Cell reports*,  
5 10.1016/j.celrep.2015.07.046.
- 6 26. Kori,S., Ferry,L., Matano,S., Jimenji,T., Kodera,N., Tsusaka,T., Matsumura,R., Oda,T.,  
7 Sato,M., Dohmae,N., *et al.* (2019) Structure of the UHRF1 Tandem Tudor Domain  
8 Bound to a Methylated Non-histone Protein, LIG1, Reveals Rules for Binding and  
9 Regulation. *Structure*, **27**, 485-496.e7.
- 10 27. Ferry,L., Fournier,A., Tsusaka,T., Adelmant,G., Shimazu,T., Matano,S., Kirsh,O.,  
11 Amouroux,R., Dohmae,N., Suzuki,T., *et al.* (2017) Methylation of DNA Ligase 1 by  
12 G9a/GLP Recruits UHRF1 to Replicating DNA and Regulates DNA Methylation.  
13 *Molecular Cell*, **67**, 550-565.e5.
- 14 28. Hahm,J.Y., Kim,J.-Y., Park,J.W., Kang,J.-Y., Kim,K.-B., Kim,S.-R., Cho,H. and Seo,S.-  
15 B. (2019) Methylation of UHRF1 by SET7 is essential for DNA double-strand break  
16 repair. *Nucleic Acids Research*, **47**, 184–196.
- 17 29. Li,Y., Zhang,Z., Chen,J., Liu,W., Lai,W., Liu,B., Li,X., Liu,L., Xu,S., Dong,Q., *et al.*  
18 (2018) Stella safeguards the oocyte methylome by preventing de novo methylation  
19 mediated by DNMT1. *Nature*, **564**, 136–140.
- 20 30. Zhao,S., Xu,J., Liu,S., Cui,K., Li,Z. and Liu,N. (2019) Dppa3 in pluripotency  
21 maintenance of ES cells and early embryogenesis. *Journal of Cellular Biochemistry*,  
22 **120**, 4794–4799.
- 23 31. Saitou,M., Barton,S.C. and Surani,M.A. (2002) A molecular programme for the  
24 specification of germ cell fate in mice. *Nature* 2002 418:6895, **418**, 293–300.
- 25 32. Sato,M., Kimura,T., Kurokawa,K., Fujita,Y., Abe,K., Masuhara,M., Yasunaga,T.,  
26 Ryo,A., Yamamoto,M. and Nakano,T. (2002) Identification of PGC7, a new gene

- 1 expressed specifically in preimplantation embryos and germ cells. *Mechanisms of*  
2 *development*, **113**, 91–94.
- 3 33. Payer,B., De Sousa Lopes,S.M.C., Barton,S.C., Lee,C., Saitou,M. and Surani,M.A.  
4 (2006) Generation of stella-GFP transgenic mice: a novel tool to study germ cell  
5 development. *Genesis (New York, N.Y. : 2000)*, **44**, 75–83.
- 6 34. Funaki,S., Nakamura,T., Nakatani,T., Umehara,H., Nakashima,H. and Nakano,T. (2014)  
7 Inhibition of maintenance DNA methylation by Stella. *Biochemical and Biophysical*  
8 *Research Communications*, **453**, 455–460.
- 9 35. Mulholland,C.B., Nishiyama,A., Ryan,J., Nakamura,R., Yiğit,M., Glück,I.M.,  
10 Trummer,C., Qin,W., Bartoschek,M.D., Traube,F.R., *et al.* (2020) Recent evolution of a  
11 TET-controlled and DPPA3/STELLA-driven pathway of passive DNA demethylation in  
12 mammals. *Nature Communications*, **11**.
- 13 36. Du,W., Dong,Q., Zhang,Z., Liu,B., Zhou,T., Xu,R. ming, Wang,H., Zhu,B. and Li,Y.  
14 (2019) Stella protein facilitates DNA demethylation by disrupting the chromatin  
15 association of the RING finger–type E3 ubiquitin ligase UHRF1. *Journal of Biological*  
16 *Chemistry*, **294**, 8907–8917.
- 17 37. Jain,K., Fraser,C.S., Marunde,M.R., Parker,M.M., Sagum,C., Burg,J.M., Hall,N.,  
18 Popova,I.K., Rodriguez,K.L., Vaidya,A., *et al.* (2020) Characterization of the plant  
19 homeodomain (PHD) reader family for their histone tail interactions. *Epigenetics &*  
20 *Chromatin 2020 13:1*, **13**, 1–11.
- 21 38. Musselman,C.A. and Kutateladze,T.G. (2011) Handpicking epigenetic marks with PHD  
22 fingers. *Nucleic acids research*, **39**, 9061–9071.
- 23 39. Orekhov,V.Y. and Jaravine,V.A. (2011) Analysis of non-uniformly sampled spectra with  
24 multi-dimensional decomposition. *Progress in Nuclear Magnetic Resonance*  
25 *Spectroscopy*, **59**, 271–292.
- 26 40. Ying,J., Delaglio,F., Torchia,D.A. and Bax,A. (2017) Sparse multidimensional iterative

- 1 lineshape-enhanced (SMILE) reconstruction of both non-uniformly sampled and  
2 conventional NMR data. *Journal of Biomolecular NMR*, **68**, 101–118.
- 3 41. Hyberts,S.G., Milbradt,A.G., Wagner,A.B., Arthanari,H. and Wagner,G. (2012)  
4 Application of iterative soft thresholding for fast reconstruction of NMR data non-  
5 uniformly sampled with multidimensional Poisson Gap scheduling. *Journal of*  
6 *Biomolecular NMR*, **52**, 315–327.
- 7 42. Delaglio,F., Grzesiek,S., Vuister,G.W., Zhu,G., Pfeifer,J. and Bax,A. (1995) NMRPipe:  
8 A multidimensional spectral processing system based on UNIX pipes. *Journal of*  
9 *Biomolecular NMR* 1995 6:3, **6**, 277–293.
- 10 43. Kobayashi,N., Iwahara,J., Koshiba,S., Tomizawa,T., Tochio,N., Güntert,P., Kigawa,T.  
11 and Yokoyama,S. (2007) KIJIRA, a package of integrated modules for systematic and  
12 interactive analysis of NMR data directed to high-throughput NMR structure studies.  
13 *Journal of Biomolecular NMR*, **39**, 31–52.
- 14 44. Johnson,B.A. and Blevins,R.A. (1994) NMR View: A computer program for the  
15 visualization and analysis of NMR data. *Journal of Biomolecular NMR* 1994 4:5, **4**,  
16 603–614.
- 17 45. Kobayashi,N., Hattori,Y., Nagata,T., Shinya,S., Güntert,P., Kojima,C. and Fujiwara,T.  
18 (2018) Noise peak filtering in multi-dimensional NMR spectra using convolutional  
19 neural networks. *Bioinformatics*, **34**, 4300–4301.
- 20 46. Schmidt,E. and Güntert,P. (2012) A new algorithm for reliable and general NMR  
21 resonance assignment. *Journal of the American Chemical Society*, **134**, 12817–12829.
- 22 47. Shen,Y., Delaglio,F., Cornilescu,G. and Bax,A. (2009) TALOS+: A hybrid method for  
23 predicting protein backbone torsion angles from NMR chemical shifts. *Journal of*  
24 *Biomolecular NMR*, **44**, 213–223.
- 25 48. Güntert,P. and Buchner,L. (2015) Combined automated NOE assignment and structure  
26 calculation with CYANA. *Journal of Biomolecular NMR*, **62**, 453–471.

- 1 49. Case,D.A., Cheatham,T.E., Darden,T., Gohlke,H., Luo,R., Merz,K.M., Onufriev,A.,  
2 Simmerling,C., Wang,B. and Woods,R.J. (2005) The Amber biomolecular simulation  
3 programs. *Journal of Computational Chemistry*, **26**, 1668–1688.
- 4 50. Clore,G.M., Driscoll,P.C., Gronenborn,A.M. and Wingfield,P.T. (1990) Analysis of the  
5 Backbone Dynamics of Interleukin-1 $\beta$  Using Two-Dimensional Inverse Detected  
6 Heteronuclear  $^{15}\text{N}$ - $^1\text{H}$  NMR Spectroscopy. *Biochemistry*, **29**, 7387–7401.
- 7 51. Mulholland,C.B., Smets,M., Schmidtman,E., Leidescher,S., Markaki,Y., Hofweber,M.,  
8 Qin,W., Manzo,M., Kremmer,E., Thanisch,K., *et al.* (2015) A modular open platform  
9 for systematic functional studies under physiological conditions. *Nucleic Acids*  
10 *Research*, **43**, e112.
- 11 52. Laible,G., Wolf,A., Dorn,R., Reuter,G., Nislow,C., Lebersorger,A., Popkin,D., Pillus,L.  
12 and Jenuwein,T. (1997) Mammalian homologues of the Polycomb-group gene Enhancer  
13 of zeste mediate gene silencing in *Drosophila* heterochromatin and at *S. cerevisiae*  
14 telomeres. *The EMBO journal*, **16**, 3219–3232.
- 15 53. Mátés,L., Chuah,M.K.L., Belay,E., Jerchow,B., Manoj,N., Acosta-Sanchez,A.,  
16 Grzela,D.P., Schmitt,A., Becker,K., Matrai,J., *et al.* (2009) Molecular evolution of a  
17 novel hyperactive Sleeping Beauty transposase enables robust stable gene transfer in  
18 vertebrates. *Nature genetics*, **41**, 753–761.
- 19 54. Méndez,J. and Stillman,B. (2000) Chromatin association of human origin recognition  
20 complex, cdc6, and minichromosome maintenance proteins during the cell cycle:  
21 assembly of prereplication complexes in late mitosis. *Molecular and cellular biology*,  
22 **20**, 8602–8612.
- 23 55. Clore,G.M., Driscoll,P.C., Gronenborn,A.M. and Wingfield,P.T. (1990) Analysis of the  
24 Backbone Dynamics of Interleukin-1 $\beta$  Using Two-Dimensional Inverse Detected  
25 Heteronuclear  $^{15}\text{N}$ - $^1\text{H}$  NMR Spectroscopy. *Biochemistry*, **29**, 7387–7401.
- 26 56. Sanchez,R. and Zhou,M.M. (2011) The PHD Finger: A Versatile Epigenome Reader.



- 1        *Trends in biochemical sciences*, **36**, 364.
- 2    57. Sidhu,H. and Capalash,N. (2017) UHRF1: The key regulator of epigenetics and  
3        molecular target for cancer therapeutics. *Tumour biology : the journal of the*  
4        *International Society for Oncodevelopmental Biology and Medicine*, **39**, 1–11.
- 5    58. Yan,Q., Zhang,Y., Fang,X., Liu,B., Wong,T.L., Gong,L., Liu,S., Yu,D., Liu,M., Jiang,L.,  
6        *et al.* (2021) PGC7 promotes tumor oncogenic dedifferentiation through remodeling  
7        DNA methylation pattern for key developmental transcription factors. *Cell Death and*  
8        *Differentiation*, **28**, 1955–1970.

9

10

1 **TABLE AND FIGURES LEGENDS**

2

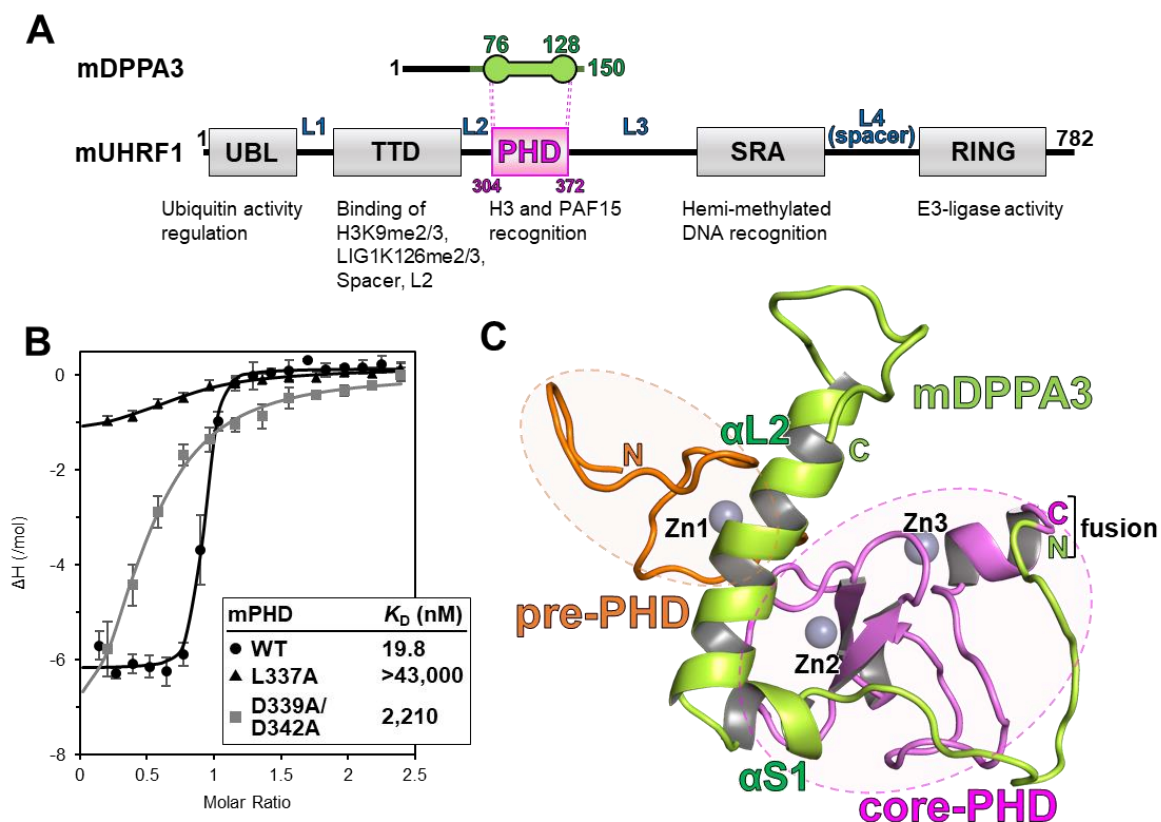

Figure 1

3 **Figure 1: Structural determination of mPHD-mDPPA3.**

4 (A) Schematic of the domain organization of mouse UHRF1 and DPPA3. L1-L4 indicate the

5 connecting linkers. (B) ITC measurements for the mPHD wild-type (WT)/mutant and mDPPA3

6 (residues 76–128 W). Superimposition of enthalpy change plots with standard deviations. (C)

7 Overall NMR structure of mPHD-mDPPA3. Pre-PHD, core-PHD, and mDPPA3 are shown as

8 orange, pink, and green cartoons, respectively. Zinc ions are depicted as gray-sphere models.

9

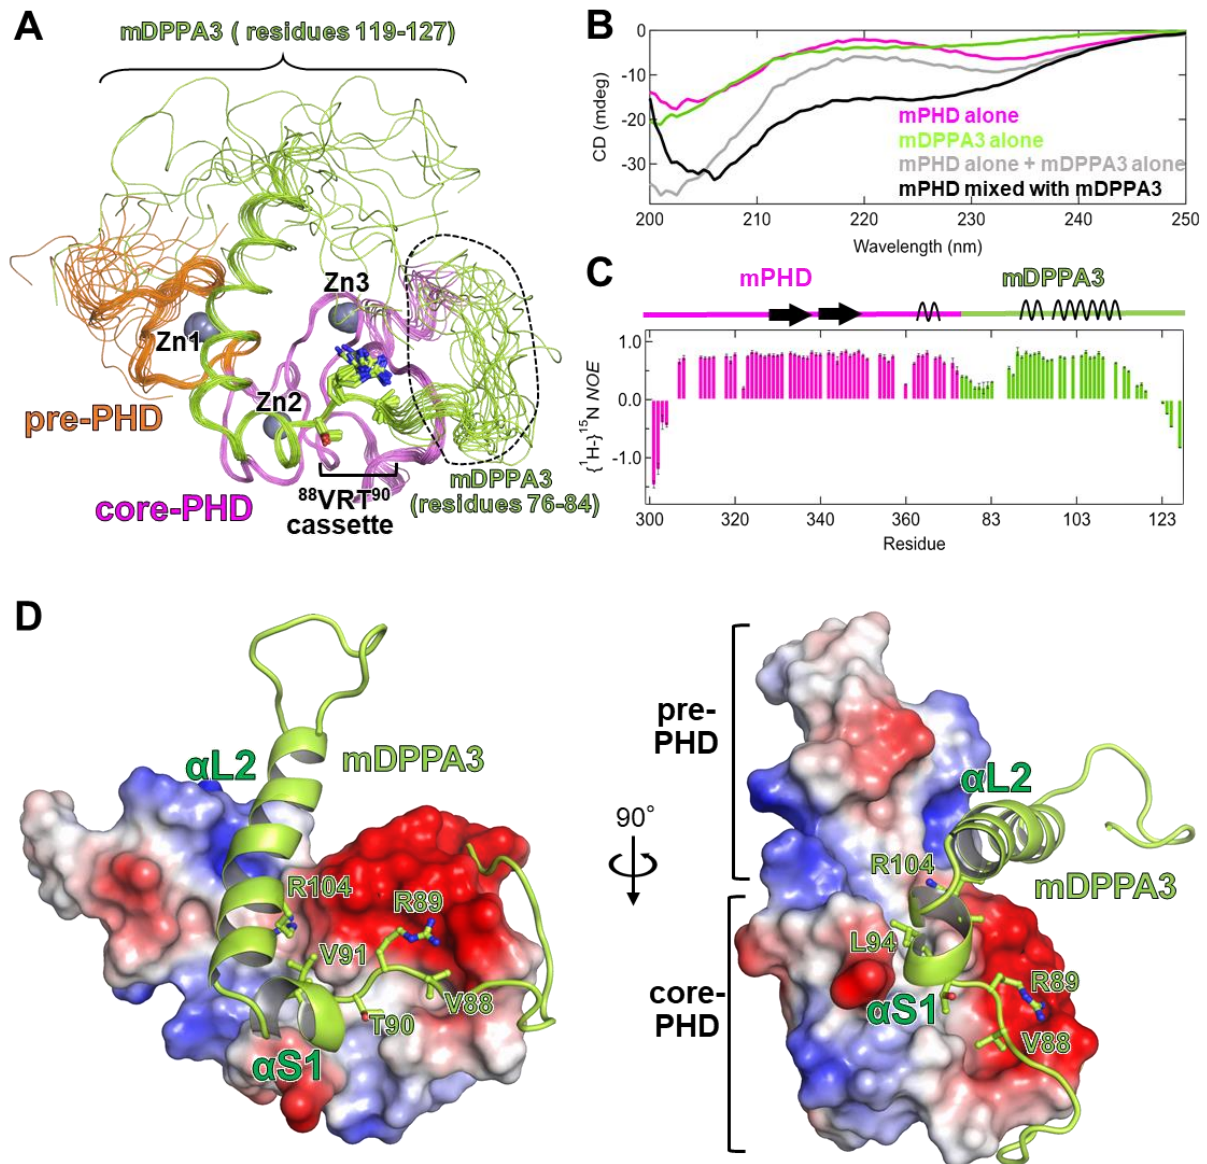

Figure 2

1 **Figure 2: Structural analysis of mPHD-mDPPA3.**

- 2 (A) Overlay of 20 NMR structures in which the structurally unconverged regions of mDPPA3  
3 are indicated. The colour scheme is the same as that in Figure 1C. (B) Backbone  $\{^1\text{H}\}$ - $^{15}\text{N}$   
4 heteronuclear NOE of mPHD-mDPPA3. The het-NOE values were colour-coded pink for  
5 mPHD and green for mDPPA3<sub>76-127</sub> regions. (C) CD spectra of mPHD (pink), mDPPA3<sub>76-127</sub>  
6 (green), and the mPHD/mDPPA3<sub>76-127</sub> complex (black). Summary of CD spectra of mPHD and  
7 mPDDA3<sub>76-127</sub> (gray). (D) Electrostatic surface potential of mPHD. The surface colours red  
8 and blue represent negative and positive charges, respectively. mDPPA3 is depicted as a green

1 cartoon with a stick model of the key residues that interact with mPHD.

2

3

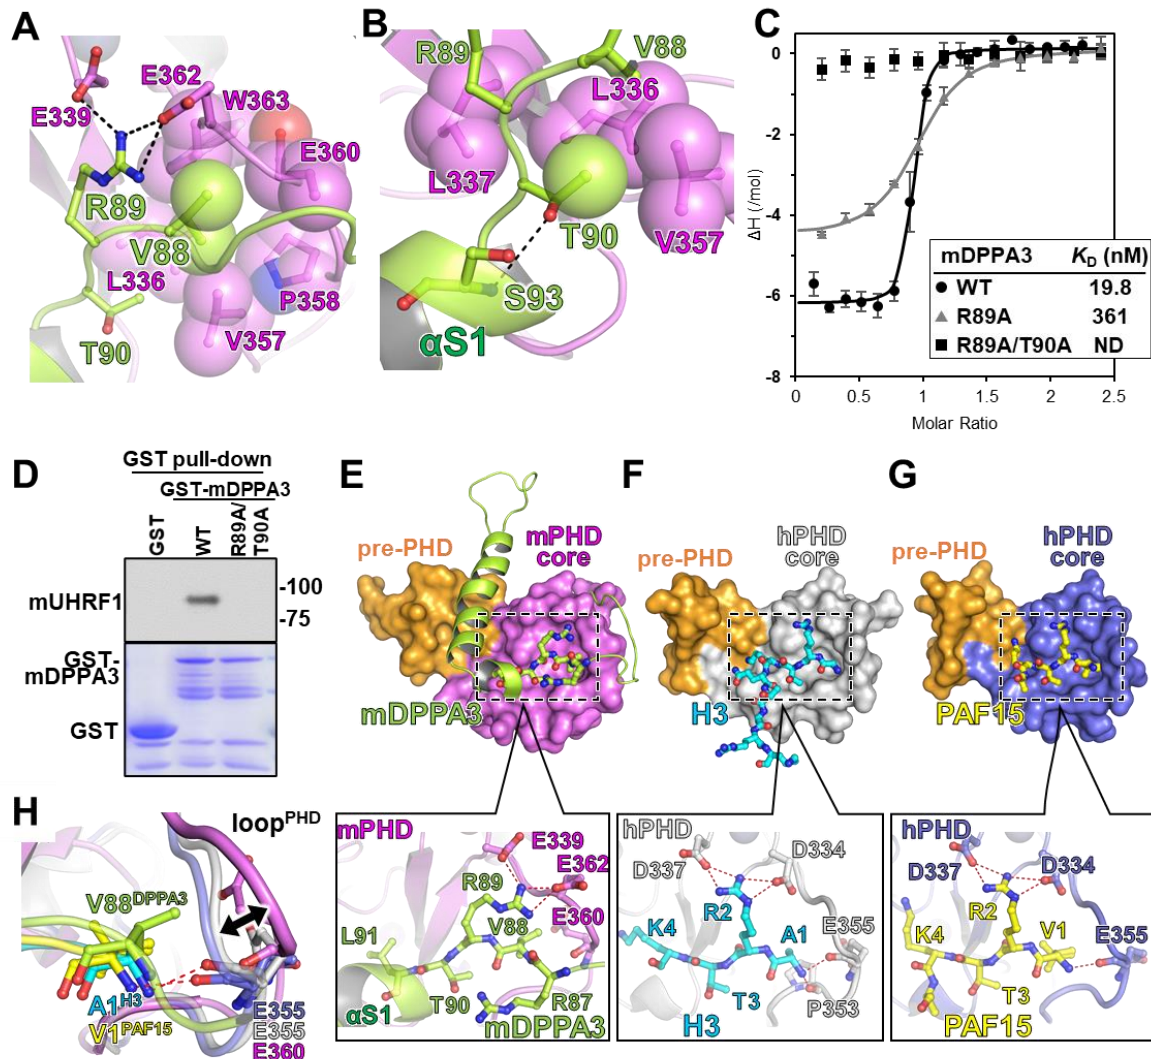

Figure 3

1 **Figure 3: Recognition of the <sup>88</sup>VRT<sup>90</sup> cassette of mDPPA3 by mPHD.**

2 (A) Recognition of Val88 and Arg89 in mDPPA3. The mDPPA3 residues are shown as a green  
3 stick model and transparent sphere model of Val88 methyl groups overlaid on the stick model.  
4 mPHD residues that are involved in the recognition of Val88 of mDPPA3 are depicted as a pink  
5 stick model superimposed on a transparent sphere model, and Glu339/Glu362 are shown as  
6 pink stick models. The black dashed lines indicate the hydrogen bonds. (B) Recognition of  
7 Thr90 of mDPPA3 showing a green stick model for hydrophobic residues of mPHD and a pink  
8 stick model with a transparent sphere model. The hydrogen bond is indicated by the black  
9 dashed line. (C) ITC measurements using mutants in the VRT cassette mDPPA3 and mPHD

1 WT. Superimposition of enthalpy change plots with standard deviations. **(D)** GST pull-down  
2 assay to detect the interaction between full-length mouse UHRF1 (mUHRF1) and full-length  
3 GST-mDPPA3 wild-type (WT) and mutant proteins. **(E)** The upper panel shows the overall  
4 structure of mPHD (pre-PHD: orange surface, core-PHD: pink surface) bound to mDPPA3  
5 (green stick model). The lower panel shows recognition of the <sup>88</sup>VRT<sup>90</sup> cassette of mDPPA3.  
6 The red dashed lines indicate the hydrogen bonds. **(F)** The upper panel shows the overall  
7 structure of hPHD (pre-PHD: orange surface, core-PHD: gray surface) bound to H3 (cyan stick  
8 model) (PDB: 3ASK). The lower panel shows recognition of <sup>1</sup>ARTK<sup>4</sup> of H3 by human PHD.  
9 **(G)** The upper panel shows the overall structure of hPHD (pre-PHD: orange surface, core-  
10 PHD: light-purple surface) bound to PAF15 (yellow stick model) (PDB: 6IIW). The lower  
11 panel shows recognition of <sup>1</sup>VRTK<sup>4</sup> of PAF15 by hPHD. **(H)** Overlay of the N-terminus of H3,  
12 PAF15, and V88 of mDPPA3. The double arrow indicates the structural difference between the  
13 loops in the PHDs.  
14

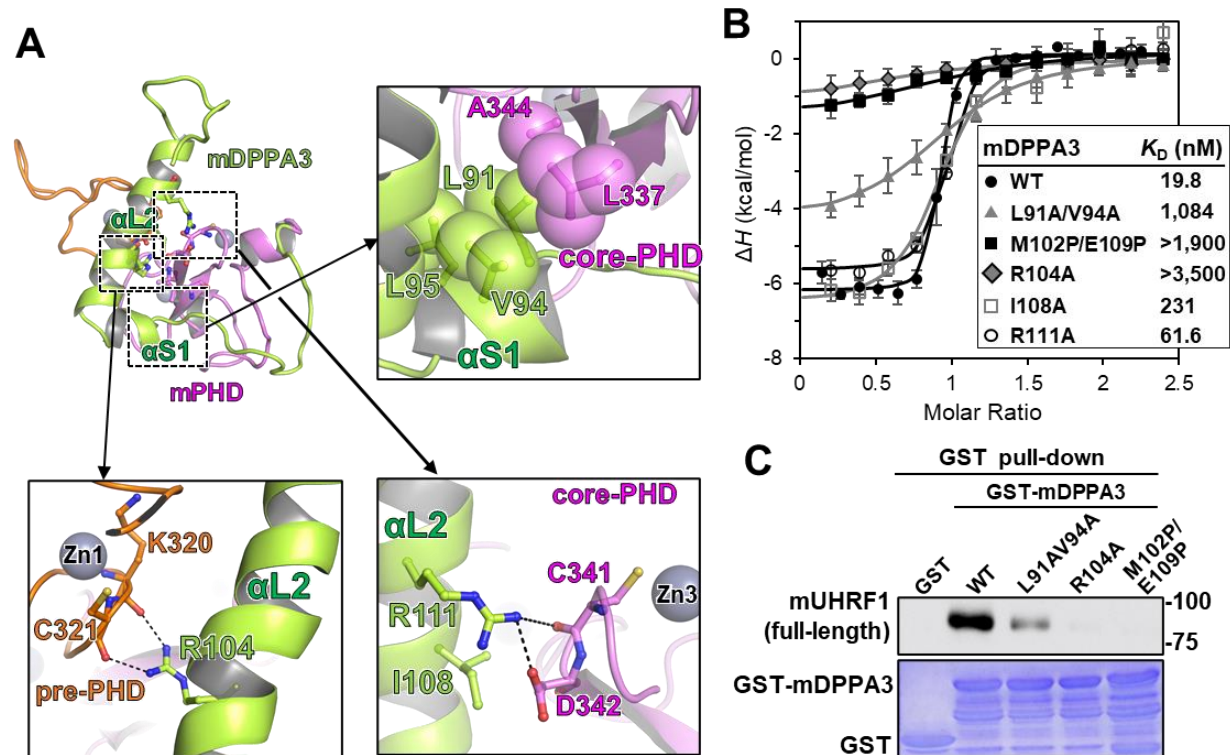

Figure 4

1 **Figure 4: Contribution of the two helices of mDPPA3 for binding to mPHD.**

2 (A) Interaction between the two helices of mDPPA3 and mPHD. The top-left panel displays  
 3 the overall structure of the mPHD-mDPPA3 complex in the cartoon mode. The top-right panel  
 4 shows the interaction between the  $\alpha$ S1 of mDPPA3 and the hydrophobic patch of mPHD. The  
 5 bottom-left panel depicts the binding of Arg104 in mDPPA3 to the pre-PHD domain. The black  
 6 dashed lines indicate the hydrogen bonds. The bottom-right panel shows the interaction  
 7 between Cys341/Asp342 in core-PHD and Ile108/Arg111 on the  $\alpha$ L2 of mDPPA3. The colour  
 8 scheme is the same as that shown in Figure 3A. Transparent sphere models of the side chains  
 9 of hydrophobic residues were superimposed on the corresponding stick models. (B) ITC  
 10 measurements using mutants of  $\alpha$ -helices of mDPPA3 and WT mPHD. Superimposition of  
 11 enthalpy change plots with standard deviations. (C) GST pull-down assay to detect the  
 12 interaction between mUHRF1 and full-length GST-mDPPA3 WT and mutants in  $\alpha$ S1 and  $\alpha$ L2.  
 13

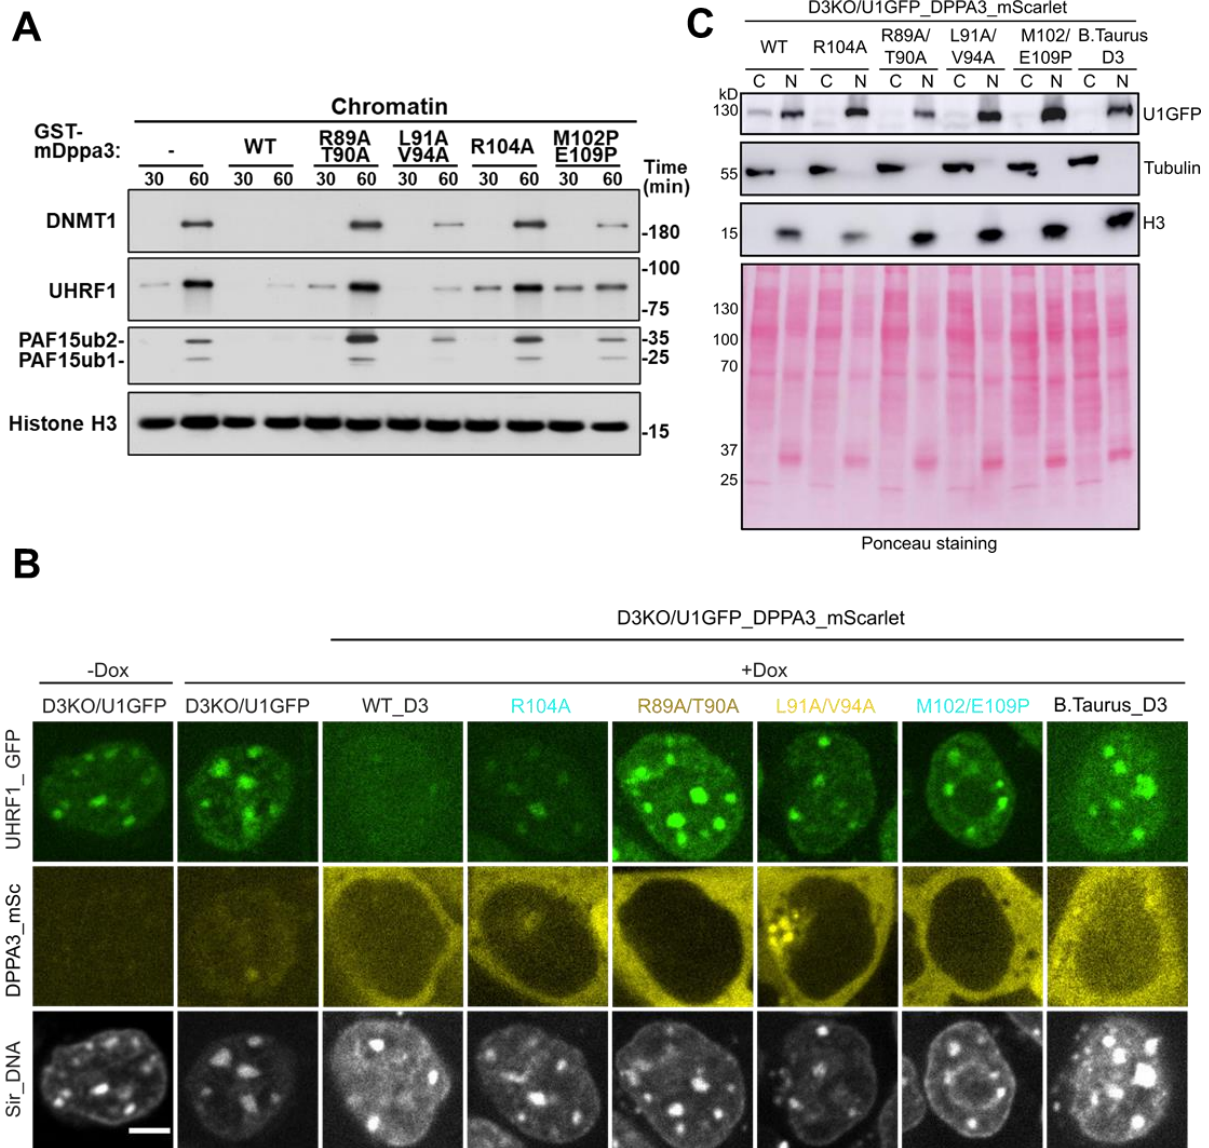

Figure 5

1

2 **Figure 5: Effect of chromatin binding and nuclear localization of UHRF1 by mDPPA3**  
 3 **mutants in *Xenopus* egg extracts and in mouse ESCs**

4 **(A)** Sperm chromatin was incubated with interphase *Xenopus* egg extracts supplemented with  
 5 buffer (+buffer), GST-mDPPA3 (+mDPPA3), or each mDPPA3 mutant. Chromatin fractions  
 6 were isolated and immunoblotted using the indicated antibodies. Representative data from n =  
 7 3 independent experiments. **(B)** Representative images illustrating the localization of UHRF1-  
 8 GFP, and mouse and *B. taurus* DPPA3-mScarlet fusions in live U1G/D3KO + pSB-D3-mSC



1 ESCs after doxycycline induction. DNA counterstain: SiR-DNA. Scale bar: 5  $\mu$ m. (C)  
2 Subcellular distribution of UHRF1-GFP before and after DPPA3-mScarlet induction as  
3 determined by cell fractionation and western blot analyses. Cells were fractionated into  
4 cytoplasmic (C) and nuclear fractions (N). Anti-tubulin and anti-H3 blots were performed to  
5 identify the two fractions. Ponceau S stained blots were used as a loading control. UHRF1-  
6 GFP was detected using an anti-GFP antibody to determine its distribution in the C and N  
7 fractions.  
8

1 **Table 1. NMR and refinement statistics for protein structures**

2

---

|                                              | <b>mPHD-mDPPA3 fusion</b> |
|----------------------------------------------|---------------------------|
| <b>NMR distance and dihedral constraints</b> |                           |
| Distance constraints                         |                           |
| Total NOE                                    | 1897                      |
| Intra-residue                                | 364                       |
| Inter-residue                                |                           |
| Sequential ( $ i - j  = 1$ )                 | 587                       |
| Medium-range ( $ i - j  < 4$ )               | 419                       |
| Long-range ( $ i - j  > 5$ )                 | 527                       |
| Intermolecular                               |                           |
| Hydrogen bonds                               | 15                        |
| Total dihedral angle restraints              | 100                       |
| $\phi$                                       | 50                        |
| $\psi$                                       | 50                        |
| <b>Structure statistics</b>                  |                           |
| Violations (mean and s.d.)                   |                           |
| Distance constraints (Å)                     | 0.057 +/- 0.006           |
| Dihedral angle constraints (°)               | 1.577 +/- 0.078           |
| Max. dihedral angle violation (°)            | 11.6                      |
| Max. distance constraint violation (Å)       | 0.38                      |

---

3

4

5

6

7

8

1 **Table 2. AMBER refinement statistics for complexes**

2

---

|                                                   | <b>mPHD-mDPPA3</b>       |
|---------------------------------------------------|--------------------------|
| <b>Structure statistics</b>                       |                          |
| Energy (mean and s.d.)                            |                          |
| E-AMBER (kcal/mol)                                | -5314.54 +/- 19.75       |
| NMR NOE                                           | 36.31 +/- 2.59           |
| NMR Dihedral                                      | 6.92 +/- 0.87            |
| Violations                                        |                          |
| Number of distance constraints > 0.1 Å, > 0.5 Å   | 24.6 +/- 3.3, 0+/-0      |
| Number of dihedral angle constraints > 2.5°, > 5° | 15.9 +/- 2.1, 12.1+/-1.5 |
| Max. dihedral angle violation (°)                 | 31.5                     |
| Max. distance constraint violation (Å)            | 0.45                     |
| Ramachandran plot statistics (%)                  |                          |
| Residues in favored regions                       | 88 +/- 1                 |
| Residues in allowed regions                       | 11 +/- 2                 |
| Residues in outlier regions                       | 1 +/- 0                  |
| Average pairwise r.m.s. deviation** (Å)           |                          |
| Heavy                                             | 0.850                    |
| Backbone (Ca, N, CO)                              | 0.396                    |

---

3 <sup>1</sup>H-<sup>1</sup>H distance (exclusively derived from the NOE peaks) and dihedral (predicted by  
4 TALOS+) constraints for the AMBER refinements were identical to those applied to the  
5 CYANA calculations.  
6 Ordered residues were automatically identified by Fit\_Robot, residues on PHD domain: 9-  
7 15,18-60,62-68, and peptide: 86-112,127-129.

8

9

10

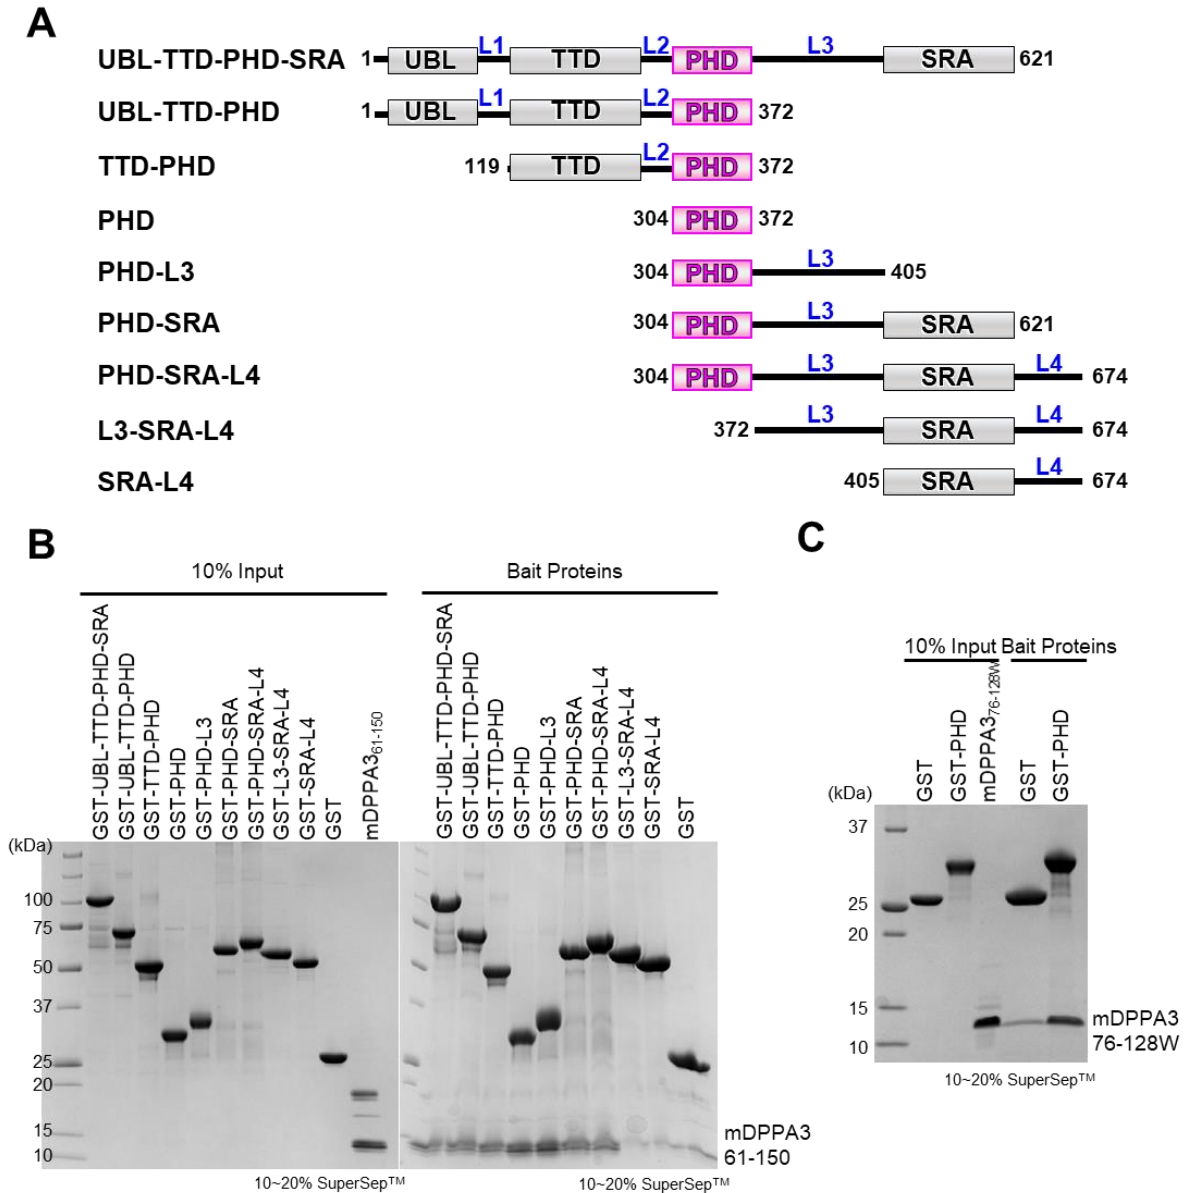

1  
2  
3  
4  
5  
6  
7  
8  
9

**Supplementary Figure S1: GST pull-down assay for detecting the interaction between truncate version of GST-fused mUHRF1 and mDPPA3.**

(A) Schematic figure of domain structures of mUHRF1 that used for the pull-down assay (B) GST pull-down experiments using truncated forms of GST-mUHRF1 and C-terminal fragment of mDPPA3 (residues 61-150). (C) GST pull-down experiments using mPHD and mDPPA3 (residues 76-128W). Bait proteins mean GST-fused mUHRF1 that is immobilized on GST-beads. Proteins are stained by Coomassie Brilliant Blue.

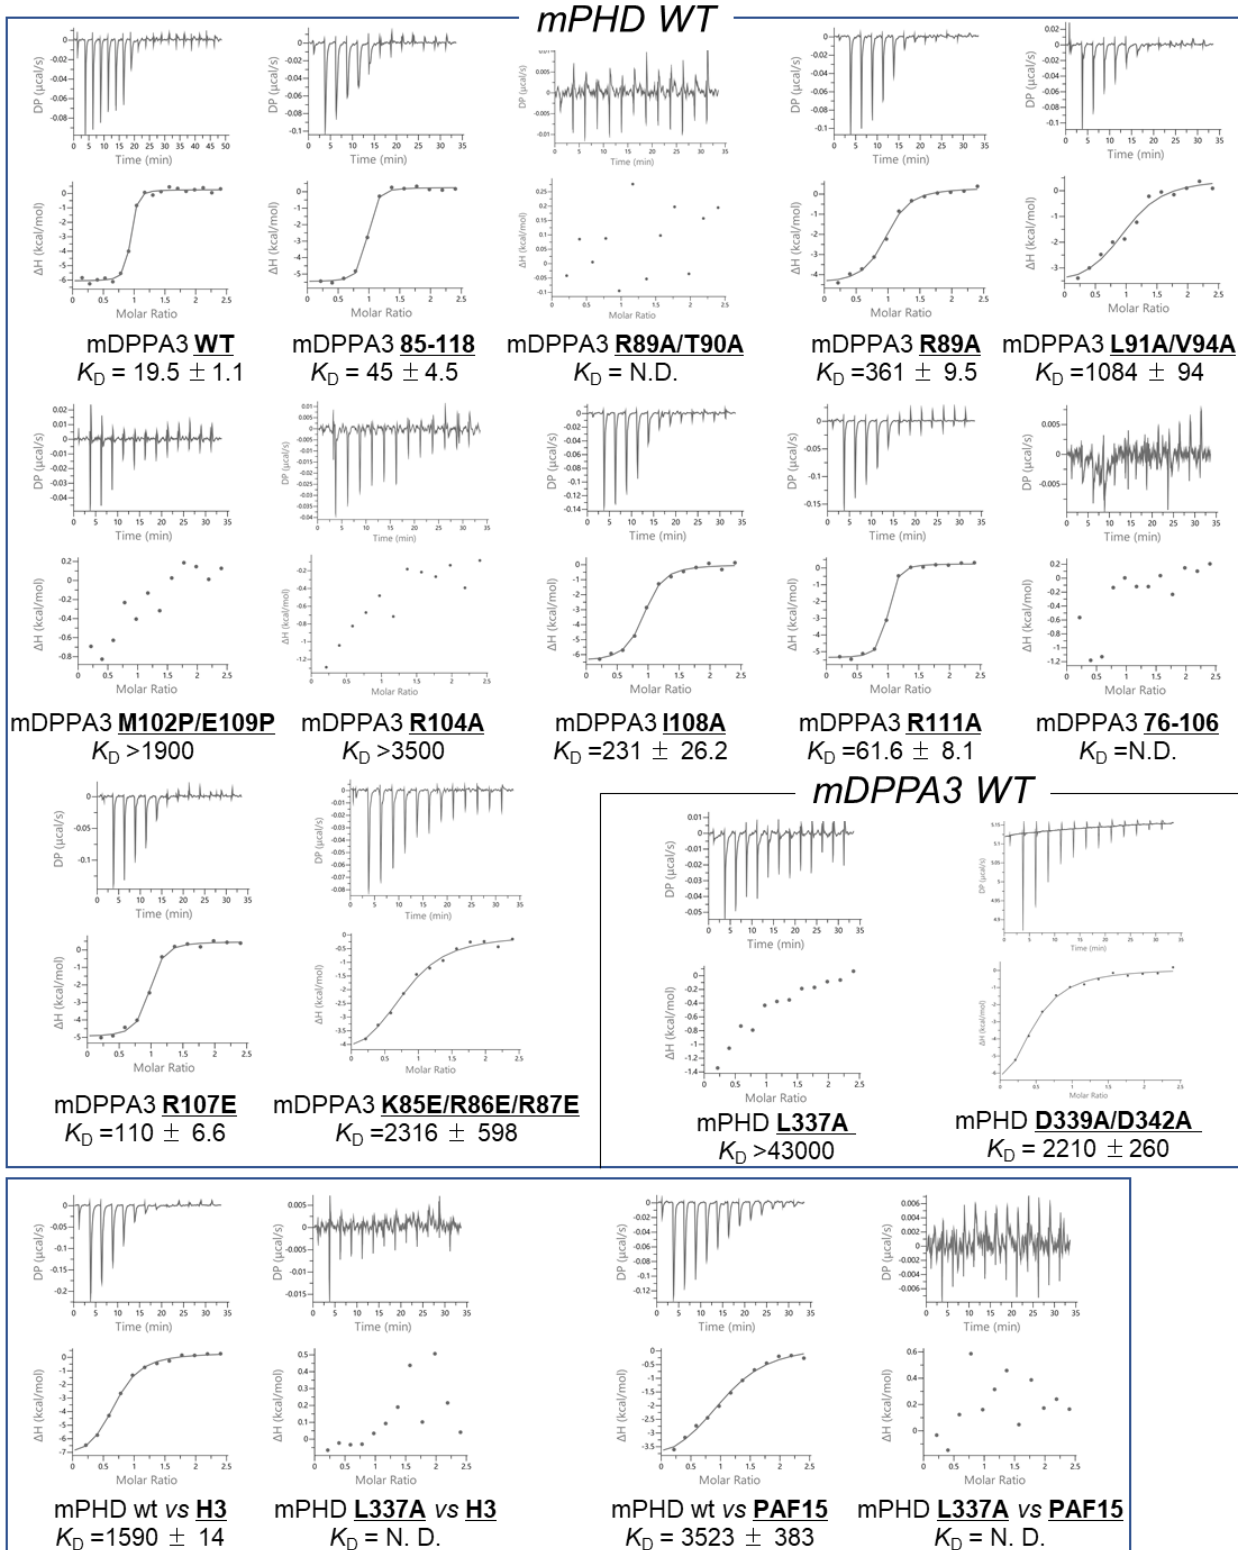

1 **Supplementary Figure S2: ITC thermograms (upper) and plots of corrected heat values**  
 2 **(lower) for the indicated binding experiments.**

3

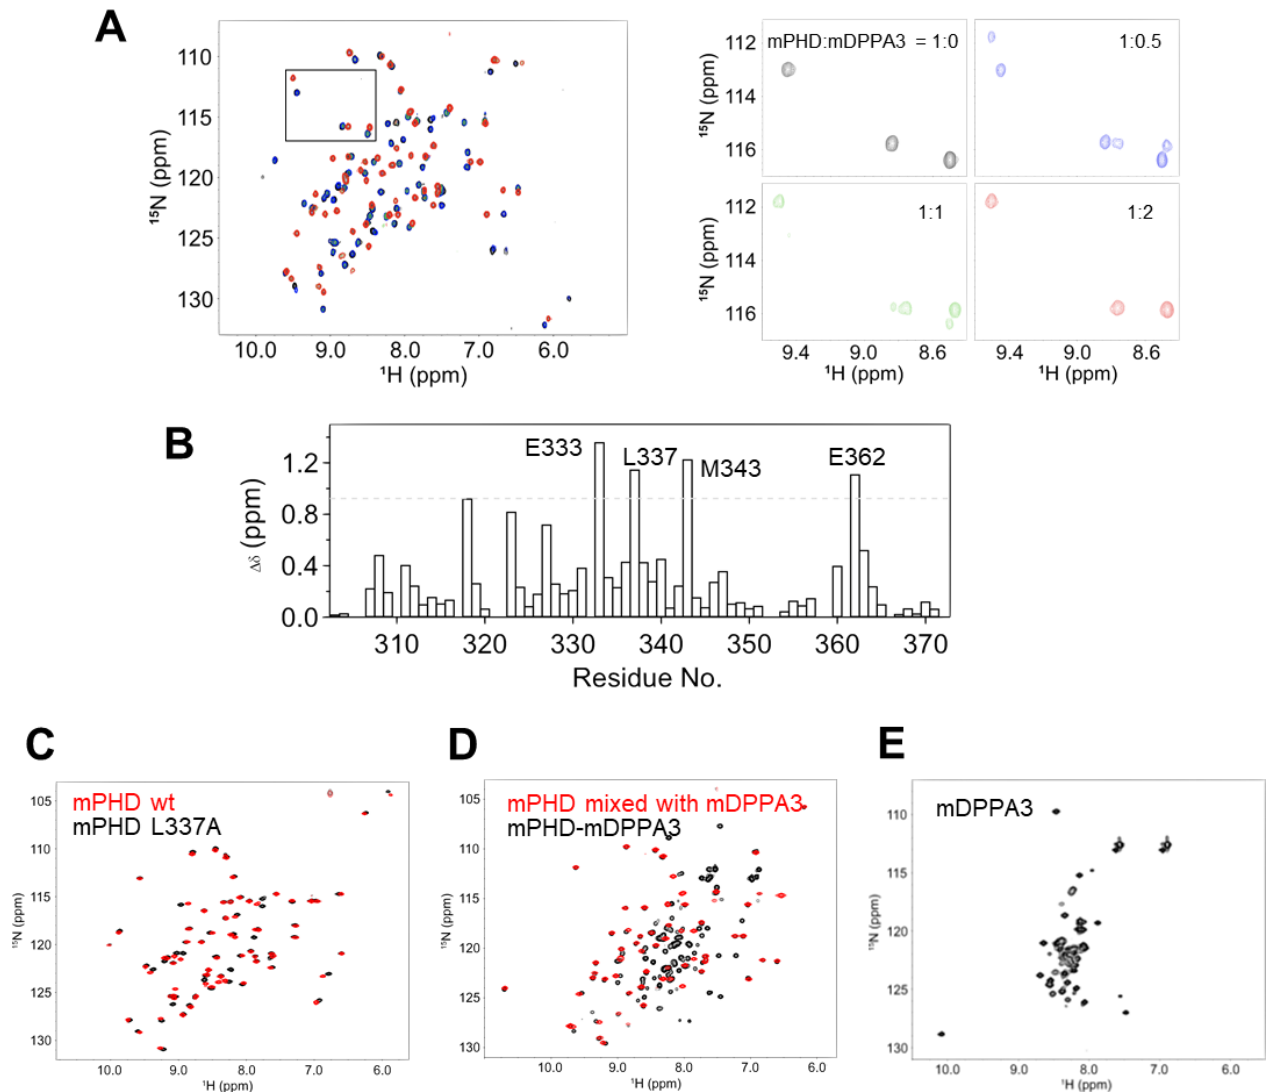

1

## 2 **Supplementary Figure S3: NMR analysis.**

3 **(A)** Overlay of  $^1\text{H}$ - $^{15}\text{N}$  HSQC spectra of 30  $\mu\text{M}$  mPHD showing chemical shift changes upon  
4 titration with mDPPA3<sub>76-127</sub> of 0  $\mu\text{M}$  (black), 15  $\mu\text{M}$  (blue), 30  $\mu\text{M}$  (green) and 60  $\mu\text{M}$  (red).  
5 Square regions inside the HSQC spectra were expanded (right panels). **(B)** Weighted average  
6 chemical shift differences of  $^1\text{H}$  and  $^{15}\text{N}$  resonances between free mPHD and mPHD-mDPPA3  
7 complex. Dashed line represents mean plus 2 standard deviations. **(C)** Overlay of  $^1\text{H}$ - $^{15}\text{N}$   
8 HSQC spectra of mPHD wild type (Black) and L337A mutant (red). **(D)** Overlay of  $^1\text{H}$ - $^{15}\text{N}$   
9 HSQC spectra of  $^{15}\text{N}$ -labeled mPHD-mDPPA3 (Black) and  $^{15}\text{N}$ -labeled mPHD mixed with  
10 non-labeled mDPPA3<sub>76-127</sub> (red). **(E)**  $^1\text{H}$ - $^{15}\text{N}$  HSQC spectra of mDPPA3 in the free state.

11

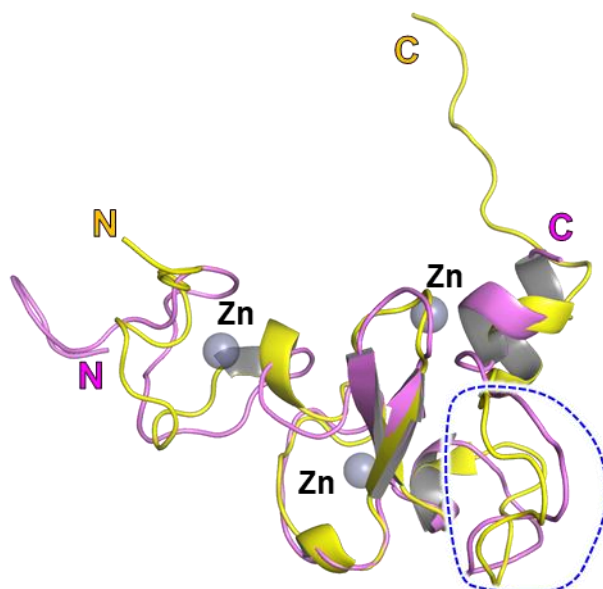

**mPHD in the complex with mDPPA3**  
**apo-mPHD (PDB: 6VFO)**

- 1 **Supplementary Figure S4: Structural comparison of mPHD and mDPPA3.**
- 2 Overlay of mPHD moiety (colored pink, residues 304-372) in the complex with mDPPA3 on
- 3 apo-mPHD (PDB: 6VFO, colored yellow, residues 303-380) solved by NMR. Blue dotted
- 4 line indicates the loop that recognizes N-terminus of H3/PAF15.
- 5

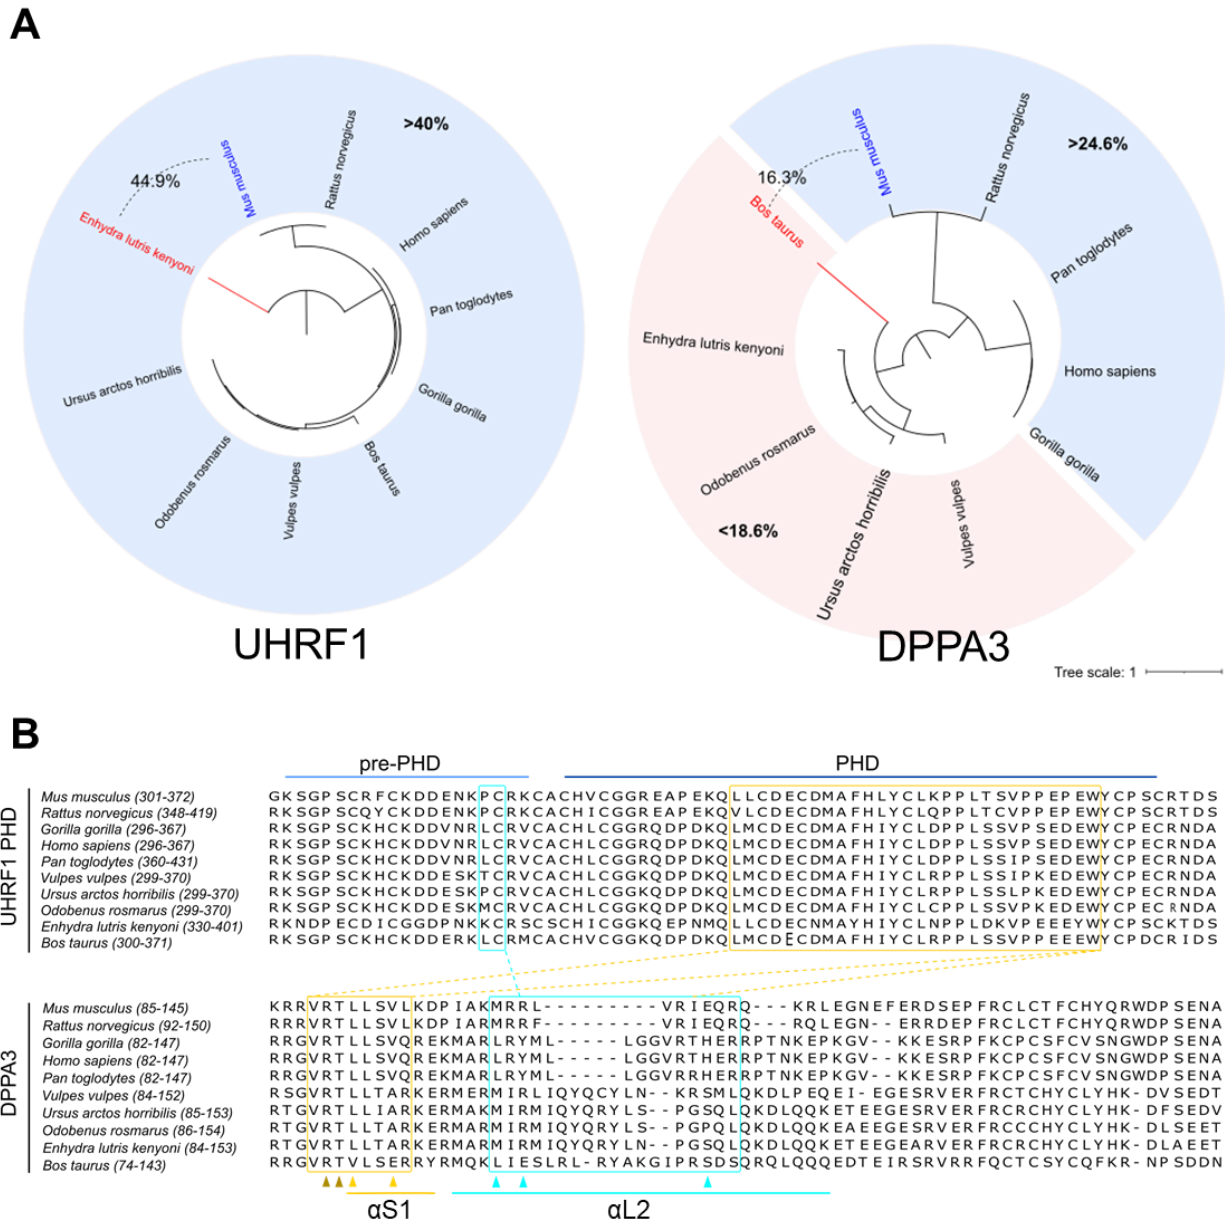

1 **Supplementary Figure S5: Phylogenetic tree and protein sequence alignment of the**  
2 **UHRF1 and DPPA3.**  
3 **(A)** Phylogenetic tree of UHRF1 and DPPA3 in different species rooting by midpoint. The  
4 pairwise identities of UHRF1 and DPPA3 between mouse and different species were  
5 indicated, light pink (low) and light blue (high). UHRF1 is conserved between species, but  
6 DPPA3 is not and forms two clusters, relative conserved (>24.6%) and not conserved  
7 (<18.6%). **(B)** Protein sequence alignment of the UHRF1 prePHD/PHD domain and DPPA3  
8 aa85-127 with Jalview software of UHRF1 and DPPA3 between different species. The red  
9 and green lines indicate the interaction interface identified in Figure x. The essential amino  
10 acids in the interaction interface labeled with yellow and cyan were characterized in Figure 5.



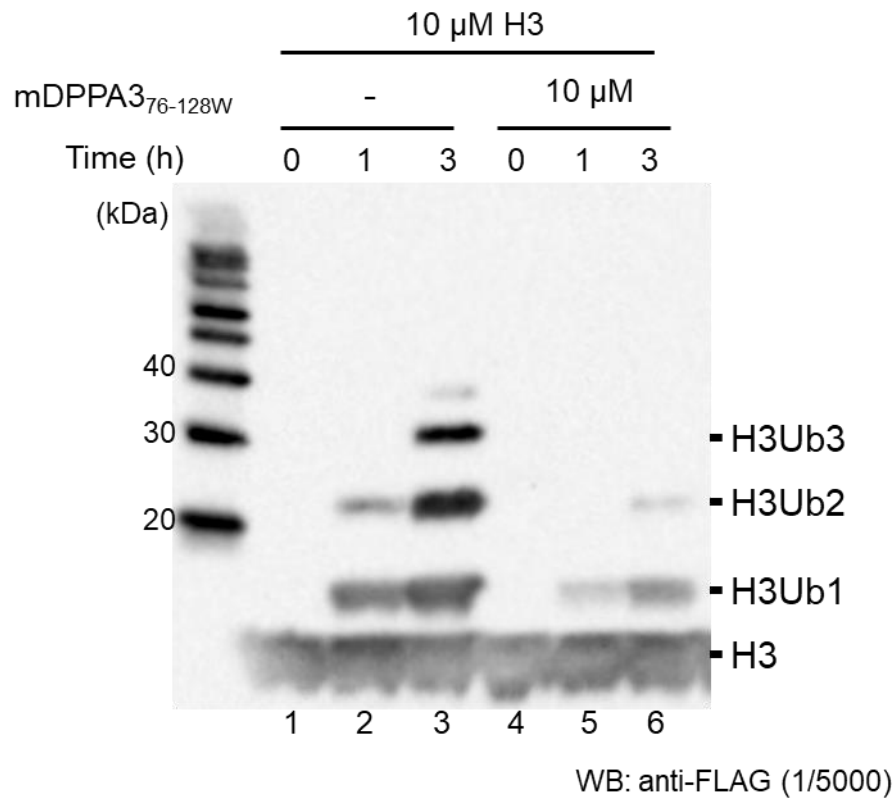

1 **Supplementary Figure S6: *in vitro* ubiquitination assay of H3 using UHRF1 as a E3-**  
2 **ligase.**

3 C-terminal FLAG tagged-H3<sub>1-37W</sub> was ubiquitinated using in house purified E1, E2 and  
4 UHRF1 (E3). The ubiquitinated H3 was detected using anti-FLAG antibody. Equimolar  
5 excess of mDPPA3 to H3 was added in lanes 4-6.

6
